# Supplementary material
Source: publisher figshare collection journal article supplement (https://acs.figshare.com/ndownloader/files/9730834)
Supplement: Supplementary file 1 [file 9730834]

# Structure-based design and discovery of new M2 receptor agonists

*Inbar Fish<sup>1,5,‡</sup>, Anne Stöbel<sup>2,‡</sup>, Katrin Eitel<sup>2,‡</sup>, Celine Valant<sup>3</sup>, Sabine Abolt<sup>3</sup>, Harald Huebner<sup>2</sup>, Dorothee Möller<sup>2</sup>, Mary J. Clark<sup>4</sup>, Roger K. Sunahara<sup>4</sup>, Arthur Christopoulos<sup>3</sup>, Brian K. Shoichet<sup>1,b</sup>, Peter Gmeiner<sup>2,\*</sup>.*

‡ Contributed equally.

\* Corresponding authors.

<sup>1</sup>Department of Pharmaceutical Chemistry, University of California, San Francisco, CA 94158, USA.

<sup>2</sup>Department of Chemistry and Pharmacy, Medicinal Chemistry, Emil Fischer Center, Friedrich Alexander University, Schuhstraße 19, 91052 Erlangen, Germany.

<sup>3</sup>Drug Discovery Biology, Monash Institute of Pharmaceutical Sciences, Monash University, Parkville VIC 3052, Australia.

<sup>4</sup>Department of Pharmacology, University of California, San Diego, La Jolla, CA 92093, USA.

<sup>5</sup>Department of Biochemistry and Molecular Biology, George S. Wise Faculty of Life Sciences, Tel-Aviv University, Ramat Aviv, Israel.

## SUPPORTING INFORMATION

### Table of Content

|                                                                          |     |
|--------------------------------------------------------------------------|-----|
| Table S1. Docking data to the inactive state                             | S2  |
| Table S2. IP-One screening assay                                         | S3  |
| Table S3. Results of docking screen and their synthesized analogs        | S4  |
| Table S4. 2D structure of the closest known muscarinic ligands           | S5  |
| Table S5. 2D structure of the closest known nicotinic ligands            | S6  |
| Figure S1. Docking poses of selected compounds                           | S8  |
| Syntheses of compound <b>1-78</b>                                        | S10 |
| IP-One <sup>®</sup> screening assay on M <sub>2</sub> R activation assay | S55 |

**Table S1. Docking data to the inactive state**

| <b>compd.</b> | Docking score<br>inactive state                | H-bond to<br>Asn <sup>6.52</sup> | <b>compd.</b> | Docking score<br>inactive state | H-bond to<br>Asn <sup>6.52</sup> |
|---------------|------------------------------------------------|----------------------------------|---------------|---------------------------------|----------------------------------|
| <b>1</b>      | -40.17                                         | N                                | <b>15</b>     | -39.41/ -42.94 <sup>a</sup>     | N                                |
| <b>2</b>      | -42.03                                         | N                                | <b>16</b>     | -39.12/ -42.6 <sup>a</sup>      | Y/N                              |
| <b>3</b>      | -44.46                                         | N                                | <b>17</b>     | -38.7                           | N                                |
| <b>4</b>      | -41.68                                         | N                                | <b>18</b>     | -38.05                          | N                                |
| <b>5</b>      | -45.13                                         | N                                | <b>19</b>     | -43.53/ -43.19 <sup>a</sup>     | N                                |
| <b>6</b>      | -41.13                                         | N                                | <b>20</b>     | -48.32                          | N                                |
| <b>7</b>      | -41.63/ -44.18/<br>-41.53/ -32.98 <sup>a</sup> | N                                | <b>21</b>     | -41.80                          | Y                                |
| <b>8</b>      | -39.62                                         | N                                | <b>22</b>     | -44.01                          | N                                |
| <b>9</b>      | -39.84                                         | N                                | <b>23</b>     | -45.08/ -45.15 <sup>a</sup>     | N                                |
| <b>10</b>     | -42.27/ -42.18 <sup>a</sup>                    | N                                | <b>24</b>     | -47.40                          | N                                |
| <b>11</b>     | -40.2/ -39.01 <sup>a</sup>                     | N                                | <b>25</b>     | -44.89                          | N                                |
| <b>12</b>     | -39.58/ -41.87 <sup>a</sup>                    | N                                | <b>26</b>     | -42.03                          | N                                |
| <b>13</b>     | -37.35/ -40.98 <sup>a</sup>                    | N                                | <b>27</b>     | -43.65                          | N                                |
| <b>14</b>     | -39.75/ -38.49 <sup>a</sup>                    | N                                | <b>28</b>     | -36.23                          | N                                |

<sup>a</sup> Racemic mixture

**Table S2. IP-One® screening assay <sup>a</sup>**

| Compound      | pEC <sub>50</sub> [μM ± SEM] <sup>b</sup> | EC <sub>50</sub> [μM ± SEM] | E <sub>max</sub> [% ± SEM] <sup>c</sup> |
|---------------|-------------------------------------------|-----------------------------|-----------------------------------------|
| 1             | 5.77 ± 0.23                               | 2.8 ± 1.7                   | 99 ± 12                                 |
| 2             | -                                         | -                           | 43 ± 18 <sup>d</sup>                    |
| 3             | 5.78 ± 0.10                               | 1.9 ± 0.5                   | 91 ± 2                                  |
| 4             | 6.12 ± 0.15                               | 0.90 ± 0.3                  | 81 ± 4                                  |
| 5             | -                                         | -                           | <5                                      |
| 6             | -                                         | -                           | 20 <sup>d</sup>                         |
| 7             | -                                         | -                           | <5                                      |
| 8             | -                                         | -                           | <5                                      |
| 9             | -                                         | -                           | 15 <sup>d</sup>                         |
| 10            | -                                         | 0.40                        | -14                                     |
| 11            | -                                         | -                           | 10 <sup>d</sup>                         |
| 12            | -                                         | -                           | <5                                      |
| 13            | -                                         | -                           | <5                                      |
| 14            | -                                         | -                           | <5                                      |
| 15            | -                                         | -                           | <5                                      |
| 16            | -                                         | -                           | <5                                      |
| 17            | 5.69 ± 0.16                               | 2.9 ± 0.9                   | 33 ± 5                                  |
| 18            | 5.29 ± 0.07                               | 5.3 ± 0.8                   | 94 ± 7                                  |
| 19            | -                                         | -                           | <5                                      |
| 20            | 5.69 ± 0.02                               | 2.0 ± 0.1                   | 72 ± 12                                 |
| 21            | -                                         | -                           | 50 <sup>c</sup>                         |
| 22            | 4.18 ± 1.1                                | 5.8 ± 2.8                   | 84 ± 4                                  |
| 23            | 6.18 ± 0.07                               | 0.67 ± 0.1                  | 102 ± 5                                 |
| 24            | -                                         | -                           | <5                                      |
| 25            | 5.90 ± 0.04                               | 1.3 ± 0.1                   | 99 ± 5                                  |
| 26            | -                                         | -                           | 48 ± 12 <sup>d</sup>                    |
| 27            | -                                         | -                           | 56 ± 0 <sup>d</sup>                     |
| 28            | 5.72 ± 0.06                               | 2.0 ± 0.2                   | 77 ± 8                                  |
| iperoxo       | 10.94 ± 0.13                              | 0.000013 ± 0.000004         | 99 ± 3                                  |
| acetylcholine | 7.35 ± 0.08                               | 0.050 ± 0.008               | 92 ± 2                                  |
| carbachol     | 6.69 ± 0.08                               | 0.22 ± 0.044                | 100                                     |

<sup>a</sup> Screening on M<sub>2</sub> receptor activation with HEK cells expressing M<sub>2</sub>R and the G-protein hybrid Gα<sub>qi5HA</sub> using the IP-One® assay from Cisbio. <sup>b</sup> pEC<sub>50</sub> and corresponding EC<sub>50</sub> values ± SEM derived from 3 to 8 individual experiments each done in duplicate. <sup>c</sup> E<sub>max</sub> values relative to the full effect of carbachol. <sup>d</sup> E<sub>max</sub> at 10 μM (no complete dose-response curve was available). “/” = not determined.

**Table S3. Results of docking screen and their synthesized analogs**

| compound   |      |          | K <sub>i</sub> [μM] <sup>a</sup> |                |                | IP accumulation assay <sup>b</sup> |                                   | IP accumulation assay <sup>c</sup> |                      |
|------------|------|----------|----------------------------------|----------------|----------------|------------------------------------|-----------------------------------|------------------------------------|----------------------|
|            | Rank | ZINC ID  | M <sub>1</sub>                   | M <sub>2</sub> | M <sub>3</sub> | EC <sub>50</sub> [μM]              | E <sub>max</sub> <sup>c</sup> [%] | EC <sub>50</sub> [μM]              | E <sub>max</sub> [%] |
| <b>29</b>  | 324  | 87391701 | 4.2                              | 6.0            | 4.1            | 3.9                                | 85                                | 11                                 | 64                   |
| <b>30</b>  | 383  | 51888450 | 18                               | 11             | 36             | 22                                 | 80                                | 22                                 | 59                   |
| <b>31</b>  | 406  | 13483620 | 64                               | 28             | <90            | -                                  | <5 <sup>d</sup>                   | /                                  | /                    |
| <b>32</b>  | 435  | 12325070 | 8.3                              | 16             | 9.7            | -                                  | <5 <sup>d</sup>                   | /                                  | /                    |
| <b>33</b>  | 449  | 19089243 | 10                               | 17             | 9.5            | 6.8                                | 76                                | 14                                 | 56                   |
| <b>34</b>  | 610  | 36222722 | >90                              | >100           | >100           | 66                                 | 24                                | -                                  | <5                   |
| <b>35</b>  | 624  | 01442735 | 39                               | 25             | 38             | -                                  | <10 <sup>d</sup>                  | /                                  | /                    |
| <b>36</b>  | 776  | 04384375 | 47                               | >55            | 80             | -                                  | <10 <sup>d</sup>                  | /                                  | /                    |
| <b>37</b>  | 780  | 11628469 | >55                              | 32             | 30             | -                                  | 15 <sup>d</sup>                   | /                                  | /                    |
| <b>38</b>  | 994  | 15020880 | 26                               | >70            | 27             | -                                  | 20 <sup>d</sup>                   | /                                  | /                    |
| <b>29a</b> | NA   | NA       | 6.1                              | 10             | 12             | 9.6                                | 65                                | 7.4                                | 27                   |
| <b>30a</b> | NA   | NA       | 38                               | 39             | 75             | 60                                 | 66                                | >100                               | 55                   |
| <b>33a</b> | NA   | NA       | 20                               | 46             | 42             | 90                                 | 61                                | 65                                 | 26                   |

<sup>a</sup> K<sub>i</sub> values ± SEM derived from 3-6 individual competition binding experiments using the radioligand [<sup>3</sup>H]*N*-methyl-scopolamine bromide. <sup>b</sup> Screening on M<sub>2</sub> receptor activation with HEK cells expressing M<sub>2</sub>R and the G-protein hybrid G<sub>αqi5HA</sub> using the IP-One<sup>®</sup> assay from Cisbio. <sup>c</sup> Second, less sensitive IP accumulation assay with COS cells coexpressing M<sub>2</sub>R and G<sub>αqi5HA</sub>. <sup>d</sup> E<sub>max</sub> at 300 μM (no complete dose-response curve was available).

**Table S4. 2D structure of the closest known muscarinic ligands**

| Zinc number | Structure of closest muscarinic ligand                                             |
|-------------|------------------------------------------------------------------------------------|
| C13739835   | 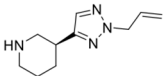  |
| C34802190   |   |
| C27984351   |  |
| C00000346   |   |

**Table S5. 2D structure of the closest known nicotinic ligands**

| compound | closest target                    | zinc id                | Structure                                                                            | Tc   |
|----------|-----------------------------------|------------------------|--------------------------------------------------------------------------------------|------|
| 3        | CHRNA10                           | C20221595              | 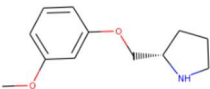   | 0.33 |
| 28       | Trace amine-associated receptor 1 | C259006                |    | 0.38 |
| 29       | $\alpha 4 \beta 2$ nAChR          | C3932135               |    | 0.36 |
| 30       | NACHRALPHA5                       | C5898<br>(Nornicotine) |  | 0.34 |
|          |                                   | C31165<br>(Anabasine)  |  | 0.34 |
|          | $\alpha 4 \beta 2$ nAChR          | C4638275               |  | 0.47 |
| 33       | $\alpha 4 \beta 2$ nAChR          | C13704010              |  | 0.62 |
|          | NACHRALPHA5                       | C5898<br>(Nornicotine) |  | 0.40 |

|            |                         |                       |                                                                                    |      |
|------------|-------------------------|-----------------------|------------------------------------------------------------------------------------|------|
| <b>29a</b> | No close target         | NA                    |                                                                                    | NA   |
| <b>30a</b> | $\alpha 4\beta 2$ nAChR | C34017099             | 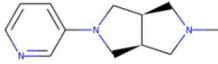 | 0.38 |
| <b>33a</b> | $\alpha 4\beta 2$ nAChR | C391812<br>(Nicotine) |  | 0.42 |
|            | NACHRALPHA5             | C391812<br>(Nicotine) |  | 0.43 |

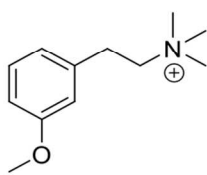

3

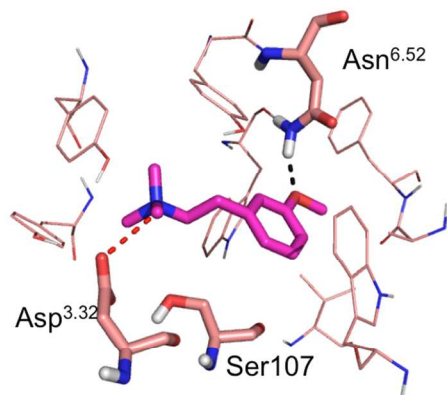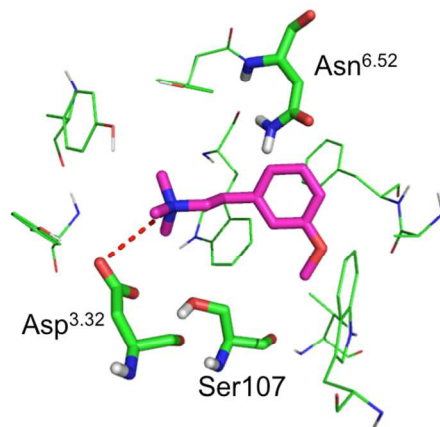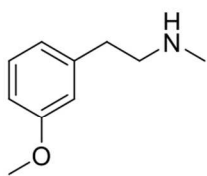

20

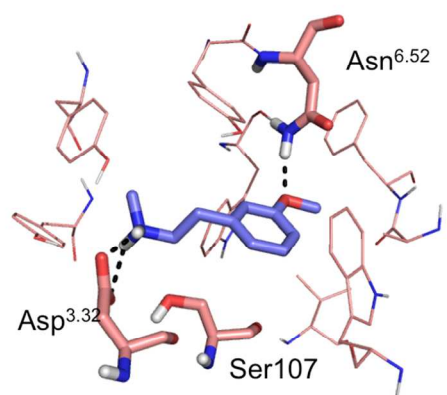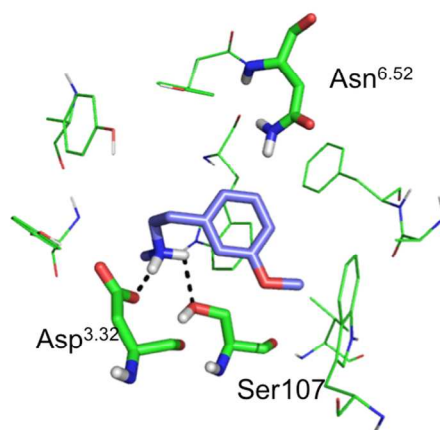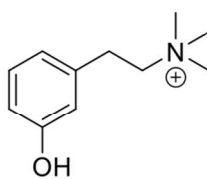

21

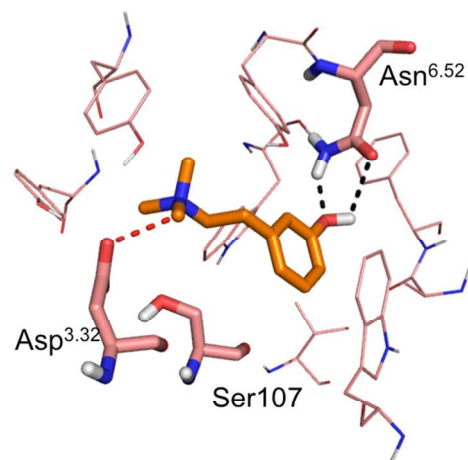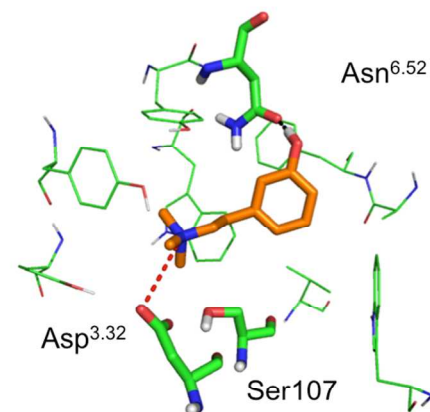



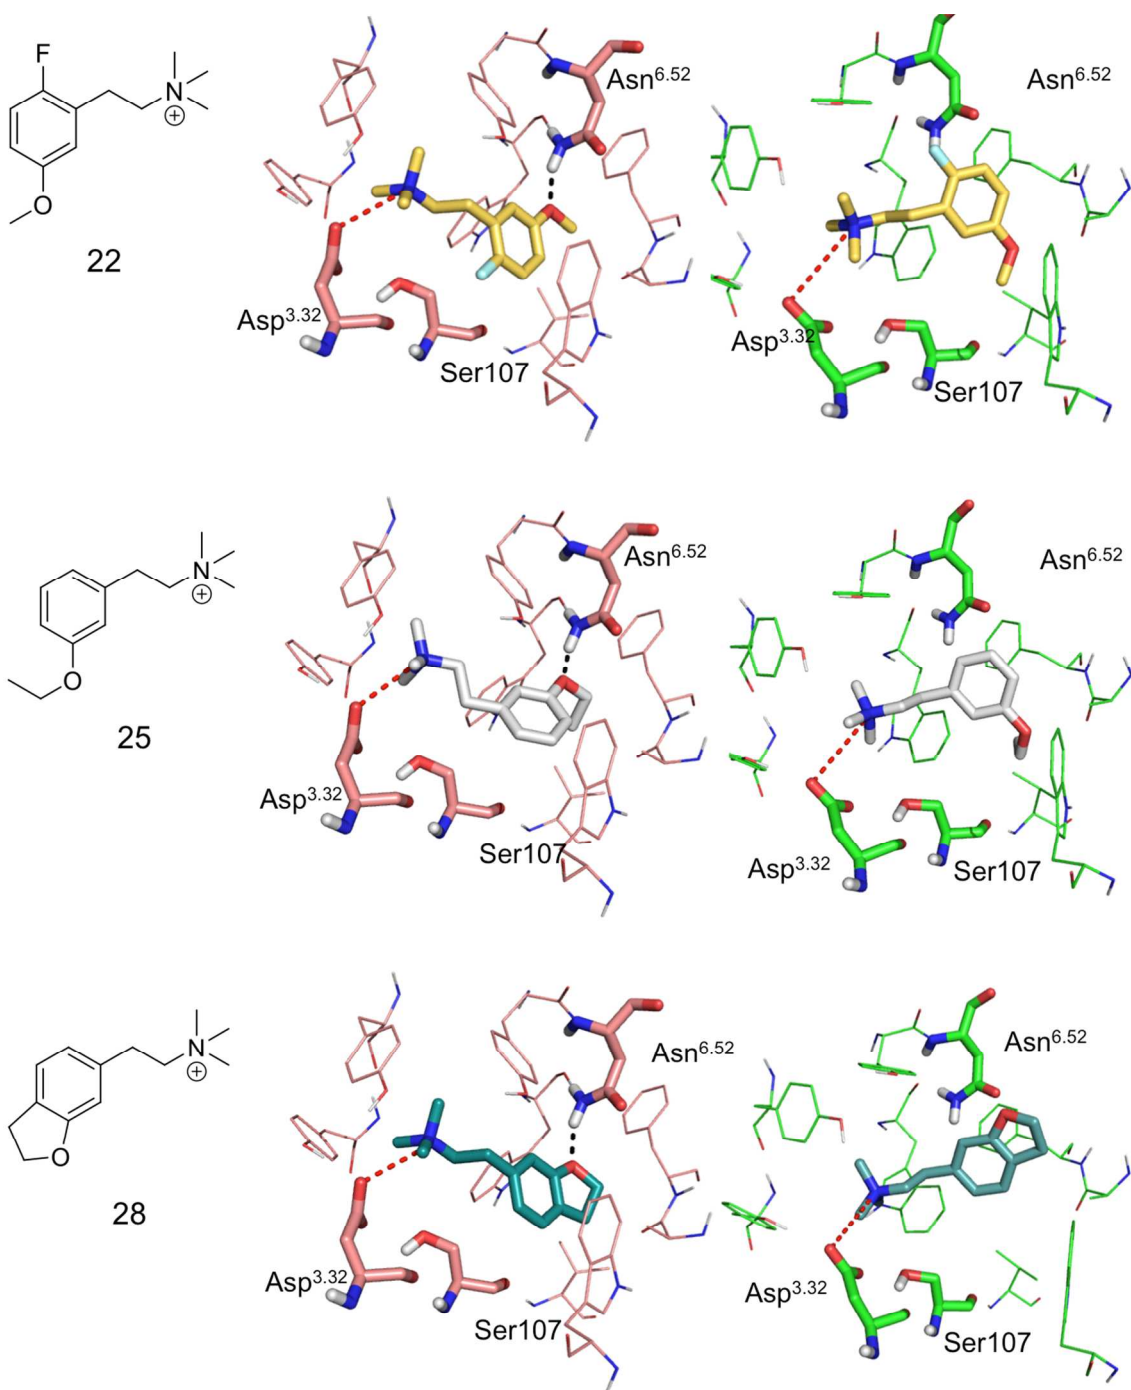

**Figure S1.** Docking poses of selected compounds in the M<sub>2</sub>R active state structure (PDB ID 4MQS) and inactive state (PDB ID 3UON). Hydrogen bonds are represented in black, Ion interactions in red.

## Chemistry

Dry solvents and reagents were of commercial quality and were used as purchased. HR-MS was run on a AB Sciex Triple TOF660 SCiex, source type ESI, or on a Bruker maXis MS in the laboratory of the Chair of Organic Chemistry, Friedrich Alexander University Erlangen-Nuernberg, or on a Bruker maXis MS in the laboratory of the Chair of Bioinorganic Chemistry, Friedrich Alexander University Erlangen-Nuernberg. NMR spectra were obtained on a Bruker Avance 360, a Bruker Avance 400 or a Bruker Avance 600 spectrometer using the solvents indicated. Chemical shifts are reported relative to TMS or acetone to the residual solvent peak. Not detected proton or carbon signals are mentioned. IR spectra were performed on a Jasco FT/IR 410 spectrometer (film on a NaCl pill). Purification by flash chromatography was performed using Silica Gel 60; TLC analyses were performed using Merck 60 F254 aluminum sheets and the spots were visualized under UV light (254 nm) and with reagents such as KMnO<sub>4</sub> vapor. Purification by preparative RP-HPLC was performed on Agilent 1100 preparative series, column: VP 250/32 NUCLEODUR C18 HTec 5 mm particles [C18], flow rate: 32 mL/min; eluent system 1: CH<sub>3</sub>CN in H<sub>2</sub>O + 0.1% HCOOH (0–3 min 10%, 3–15 min 10–45%, 15–8 min 45–100%); eluent system 2: MeOH in H<sub>2</sub>O + 0.1% HCOOH (0–3 min 5%, 3–18 min 5–100%); eluent system 3: MeOH in H<sub>2</sub>O + 0.1% HCOOH (0–3 min 10%, 3–18 min 10–100%); eluent system 4: CH<sub>3</sub>CN in H<sub>2</sub>O + 0.1% HCOOH (0–3 min 5%, 3–18 min 5–80%); eluent system 5: MeOH in H<sub>2</sub>O + 0.1% HCOOH (0–3 min 5%, 3–16 min 5–55%, 16–18 min 55–100%); eluent system 6: CH<sub>3</sub>CN in H<sub>2</sub>O + 0.1% HCOOH (0–3 min 5%, 3–10 min 5–30%, 10–13 min 30–100%); eluent system 7: 2% CH<sub>3</sub>CN in H<sub>2</sub>O + 0.1% HCOOH (isocratic). Analytical HPLC/MS was performed on Agilent 1100 HPLC systems employing a VWL detector (220 nm or 254 nm) connected to a Bruker Esquire 2000. The purity of all test compounds and key intermediates was determined by reverse phase HPLC. HPLC analysis was performed on analytical systems (Agilent 1100 analytical series, VWD detector); System A: Zorbax Eclipse XDB-C8 analytical column, 4.6 mm x 150 mm, 5 µm, flow rate: 0.5 mL/min, eluent: MeOH in H<sub>2</sub>O+0.1% HCOOH (0–3 min 10%, 3–18 min 10–100%, 18–24 min 100%); System B: Zorbax Eclipse XDB-C8 analytical column, 4.6 mm x 150 mm, 5 µm, flow rate: 0.5 mL/min, eluent: CH<sub>3</sub>CN in

H<sub>2</sub>O+0.1% HCOOH (0–3 min 5%, 3–18 min 5–95%, 18–24 min 95%); System C: EC 250/4.6 NUCLEODUR C19 Pyramid, 5  $\mu$ M, flow rate: 0.5 mL/min, eluent: MeOH in H<sub>2</sub>O+0.1% HCOOH (0–6 min 5%, 6–18 min 10–100%, 18–24 min 100%); System D: EC 250/4.6 NUCLEODUR C19 Pyramid, 5  $\mu$ M, flow rate: 0.5 mL/min, eluent: CH<sub>3</sub>CN in H<sub>2</sub>O+0.1% HCOOH (0–6 min 5%, 6–18 min 10–95%, 18–24 min 95%). Compound **1–4**, **20**, **21**, **25**, **26** were synthesized according to indicated literature.

### 1-(2-Methoxyphenyl)-*N,N*-dimethylmethanamine (**39**)<sup>1</sup>

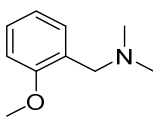

To a solution of 2-methoxybenzaldehyde (150 mg, 1.10 mmol) in dry THF (20 mL) were added dimethylamine (2 M in THF, 2.00 mL, 4.00 mmol), acetic acid (70.0  $\mu$ L, 1.17 mmol) and sodium triacetoxyborohydride (604 mg, 2.85 mmol). The reaction mixture was stirred at room temperature for 18 h. Subsequently, saturated, aqueous NaHCO<sub>3</sub> solution was added and the aqueous phase was extracted three times with ethyl acetate. The combined organic layers were washed with saturated, aqueous NaCl solution and dried (Na<sub>2</sub>SO<sub>4</sub>). After evaporation, the crude residue was purified by column chromatography on silica gel (CH<sub>2</sub>Cl<sub>2</sub>/MeOH/NH<sub>3</sub> aqu. 25%, 10:1:0.01) to give **39** (189 mg, quant.) as brown oil. IR (NaCl): 3413, 2942, 2817, 2769, 1722, 1602, 1493, 1465, 1243, 1109, 1031, 755 cm<sup>-1</sup>; <sup>1</sup>H-NMR (600 MHz, CDCl<sub>3</sub>):  $\delta$  7.27 (dd, *J* = 7.4, 1.6 Hz, 1H), 7.26–7.22 (m, 1H), 6.92 (td, *J* = 7.4, 1.0 Hz, 1H), 6.87 (d, *J* = 8.3 Hz, 1H), 3.83 (s, 3H), 3.46 (s, 2H), 2.27 (s, 6H); <sup>13</sup>C-NMR (91 MHz, CDCl<sub>3</sub>):  $\delta$  158.1, 131.1, 128.4, 126.9, 120.3, 110.6, 58.0, 55.6, 45.6; HPLC (254 nm, system A): *t*<sub>R</sub> = 5.2 min; ESI-MS: 166.3 [M+H]<sup>+</sup>.

### 1-(2-Methoxyphenyl)-*N,N,N*-trimethylmethanaminium iodide (**1**)<sup>2</sup>

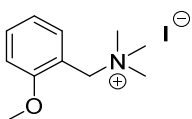

To a solution of compound **39** (12.0 mg, 72.7  $\mu\text{mol}$ ) in dry  $\text{CHCl}_3$  (2.0 mL) was added under Ar-atmosphere methyl iodide (10.0  $\mu\text{L}$ , 161  $\mu\text{mol}$ ). The reaction was stirred at room temperature for 16 h. After evaporation, the crude residue was dissolved in  $\text{CHCl}_3$  and precipitated with diethylether to afforded **1** (15.2 mg, 68%) as white solid. Mp: 162–164  $^{\circ}\text{C}$ ; IR (NaCl): 3468, 3003, 1497, 1255, 1023, 889, 763  $\text{cm}^{-1}$ ;  $^1\text{H}$ -NMR (600 MHz,  $\text{D}_2\text{O}$ ):  $\delta$  7.58 (ddd,  $J = 8.5, 7.6, 1.7$  Hz, 1H), 7.46 (dd,  $J = 7.6, 1.7$  Hz, 1H), 7.19 (d,  $J = 8.3$  Hz, 1H), 7.14–7.09 (m, 1H), 4.51 (s, 2H), 3.90 (s, 3H), 3.08 (s, 9H);  $^{13}\text{C}$ -NMR (151 MHz,  $\text{D}_2\text{O}$ ):  $\delta$  159.5, 135.2, 133.6, 121.5, 116.4, 112.7, 64.6, 56.0, 53.1 (t,  $J = 4.5$  Hz); HPLC (254 nm, system A):  $t_{\text{R}} = 12.6$  min, purity: 95%, (254 nm, system B):  $t_{\text{R}} = 12.5$  min, purity: 95%, HR-ESIMS: calcd 180.1383, found 180.13801  $[\text{M}]^+$ .

### 2-(2-Methoxyphenyl)-*N,N,N*-trimethylethan-1-aminium formate (**2**)<sup>3</sup>

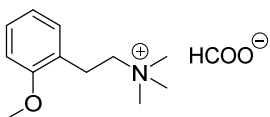

Compound **2** was synthesized according to the protocol of compound **1** using a solution of 2-(2-methoxyphenyl)ethylamine (30.0  $\mu\text{L}$ , 205  $\mu\text{mol}$ ) in dry DMF (2 mL), methyl iodide (150  $\mu\text{L}$ , 2.42 mmol) and  $\text{K}_2\text{CO}_3$  (117 mg, 848  $\mu\text{mol}$ ). Purification by preparative HPLC (system 1) afforded **2** (20.0 mg, 40%) as colorless semi solid substance. IR (NaCl): 3258, 2969, 2839, 1590, 1496, 1348, 1249, 1051, 915, 763  $\text{cm}^{-1}$ ;  $^1\text{H}$ -NMR (600 MHz,  $\text{D}_2\text{O}$ ):  $\delta$  8.45 (bs, 1H) 7.40–7.35 (m, 1H), 7.29 (dd,  $J = 7.4, 1.6$  Hz, 1H), 7.11–7.07 (m, 1H), 7.03–6.99 (m, 1H), 3.88 (s, 3H), 3.51–3.47 (m, 2H), 3.18 (s, 9H), 3.16–3.10 (m, 2H);  $^{13}\text{C}$ -NMR (151 MHz,  $\text{D}_2\text{O}$ ):  $\delta$  171.6, 157.9, 131.3, 129.8, 124.3, 121.7, 112.1, 66.2, 56.1, 53.5 (t,  $J = 4.5$  Hz), 24.8; HPLC (254 nm, system A):  $t_{\text{R}} = 12.0$  min, purity: 99%, (254 nm, system B):  $t_{\text{R}} = 11.9$  min, purity: 99%, ESI-MS: 194.3  $[\text{M}]^+$ .

### 2-(3-Methoxyphenyl)-*N,N,N*-trimethylethan-1-aminium formate (**3**)<sup>3</sup>

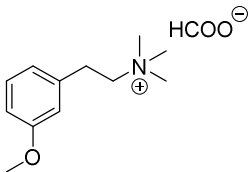

Compound **3** was synthesized according to the protocol of compound **1** using a solution of 2-(3-methoxyphenyl)ethylamine (20.0  $\mu$ L, 137  $\mu$ mol) in dry DMF (2 mL), methyl iodide (80.0  $\mu$ L, 1.29 mmol) and  $K_2CO_3$  (97.8 mg, 714  $\mu$ mol). Purification by preparative HPLC (system 3) afforded **3** (15.0 mg, 46%) as white solid. Mp: 177.6–180.2  $^{\circ}C$ ; IR (NaCl): 2989, 1591, 1489, 1257, 1170, 1039, 892, 769, 696  $cm^{-1}$ ;  $^1H$ -NMR (600 MHz,  $D_2O$ ):  $\delta$  8.44 (s, 1H), 7.38–7.35 (m, 1H), 6.99–6.94 (m, 3H), 3.84 (s, 3H), 3.60–3.56 (m, 2H), 3.19 (s, 9H), 3.17–3.13 (m, 2H);  $^{13}C$ -NMR (151 MHz,  $D_2O$ ):  $\delta$  188.1, 159.9, 138.2, 131.0, 122.3, 115.3, 113.5, 67.6, 56.0, 53.7 (t,  $J = 4.5$  Hz), 29.5; HPLC (220 nm, system A):  $t_R$  = 10.0 min, purity: > 99%, (220 nm, system B):  $t_R$  = 11.4 min, purity: > 99%; HR-ESIMS: calcd 194.1539, found 194.1539  $[M]^+$ .

### 3-(3-Methoxyphenyl)-*N,N*-dimethylpropanamide (**40**) <sup>4</sup>

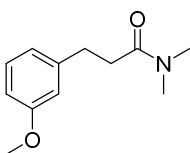

To a solution of 3-(3-methoxyphenyl)propanoic acid (420 mg, 2.33 mmol) in dry  $CH_2Cl_2$  (8 mL) was added dimethylamine (2 M in THF, 2.20 mL, 4.40 mmol), triethylamine, (310  $\mu$ L, 2.24 mmol) and *N,N*-dimethylaminopyridine (30.1 mg, 246  $\mu$ mol) under  $N_2$ -atmosphere at room temperature. The reaction mixture was cooled to 0  $^{\circ}C$ , 1-ethyl-3-(3-dimethylaminopropyl)carbodiimide hydrochloride (477 mg, 2.49 mmol) was added and the reaction mixture was stirred at 0  $^{\circ}C$  for 2 h. The reaction mixture was allowed to warm to room temperature and stirred for additional 2 h. Subsequently, ethyl acetate was added and the organic phase was washed once with saturated, aqueous citric acid solution, twice with saturated, aqueous  $NaHCO_3$  solution and once with water. The organic layer was dried ( $Na_2SO_4$ ). After evaporation, the crude residue was purified by column chromatography on silica gel ( $CH_2Cl_2/MeOH$ , 60:1) to give **40** (158 mg, 33%) as

colorless oil. IR (NaCl): 2938, 1642, 1489, 1456, 1399, 1261, 1152, 1050, 872, 783, 697  $\text{cm}^{-1}$ ;  $^1\text{H}$ -NMR (600 MHz,  $\text{CDCl}_3$ ):  $\delta$  7.20 (t,  $J = 7.8$  Hz, 1H), 6.81 (d,  $J = 7.5$  Hz, 1H), 6.79–6.76 (m, 1H), 6.76–6.73 (m, 1H), 3.79 (s, 3H), 2.97–2.92 (m, 8H), 2.64–2.59 (m, 2H);  $^{13}\text{C}$ -NMR (91 MHz,  $\text{CDCl}_3$ ):  $\delta$  172.2, 159.7, 143.2, 129.5, 120.8, 114.2, 111.4, 55.2, 35.5, 35.2, 31.4; HPLC (254 nm, system A):  $t_{\text{R}} = 17.9$  min; ESI-MS: 230.2  $[\text{M}+\text{Na}]^+$ .

### 3-(3-Methoxyphenyl)-*N,N*-dimethylpropan-1-amine (**41**) <sup>5</sup>

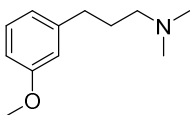

To a solution of  $\text{LiAlH}_4$  (4 M in THF, 600  $\mu\text{L}$ , 2.40 mmol) in dry THF (5 mL) was added a solution of **40** (150 mg, 725  $\mu\text{mol}$ ) in dry THF (2 mL) at 0  $^\circ\text{C}$ . The reaction mixture was stirred for 1 h at r.t. and quenched by subsequently adding water. Filtration of the precipitate and evaporation of the solvent afforded **41** (122 mg, 88%) as colorless oil. IR (NaCl): 3420, 2943, 2775, 1602, 1489, 1457, 1260, 1152, 1042, 777, 695  $\text{cm}^{-1}$ ;  $^1\text{H}$ -NMR (600 MHz,  $\text{CDCl}_3$ ):  $\delta$  7.23–7.19 (m, 1H), 6.81–6.78 (m, 1H), 6.77–6.73 (m, 2H), 3.81 (s, 3H), 2.66–2.62 (m, 2H), 2.44–2.38 (m, 2H), 2.32 (s, 6H), 1.91–1.82 (m, 2H);  $^{13}\text{C}$ -NMR (91 MHz,  $\text{CDCl}_3$ ):  $\delta$  159.7, 143.5, 129.4, 120.8, 114.2, 111.2, 59.0, 55.2, 45.1, 33.6, 28.7; HPLC (254 nm, system A):  $t_{\text{R}} = 12.5$  min; ESI-MS: 194.2  $[\text{M}+\text{H}]^+$ .

### 3-(3-Methoxyphenyl)-*N,N,N*-trimethylpropan-1-aminium iodide (**4**) <sup>2</sup>

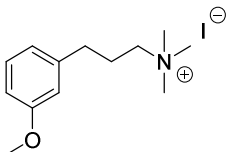

Compound **4** was synthesized according to the protocol of compound **1**, using a solution of compound **41** (6.0 mg, 31.0  $\mu\text{mol}$ ) in dry DMF (2 mL) and methyl iodide (10.0  $\mu\text{L}$ , 161  $\mu\text{mol}$ ). The compound was dissolved in  $\text{CHCl}_3$  and precipitated with diethylether to afford **4** (6.1 mg, 59%) as pale yellow oil. IR (NaCl): 3460, 3010, 2957, 1593, 1486, 1351, 1261, 1155, 1037, 958, 932, 776, 698  $\text{cm}^{-1}$ ;  $^1\text{H}$ -NMR (360 MHz,  $\text{CDCl}_3$ ):  $\delta$  7.26–

7.19 (m, 1H), 6.85–6.73 (m, 3H), 3.81 (s, 3H), 3.67–3.59 (m, 2H), 3.41 (s, 9H), 2.80–2.70 (m, 2H), 2.19–2.07 (m, 2H);  $^{13}\text{C}$ -NMR (91 MHz,  $\text{CDCl}_3$ ):  $\delta$  160.1, 140.9, 130.1, 120.8, 114.3, 112.4, 66.8, 55.6, 54.1, 32.0, 25.0; HPLC (220 nm, system A):  $t_R$  = 11.7 min, purity: 98%, (220 nm, system B):  $t_R$  = 12.2 min, purity: > 99%; ESI-MS: HR-ESIMS: calcd 208.1696, found 208.1697  $[\text{M}]^+$ .

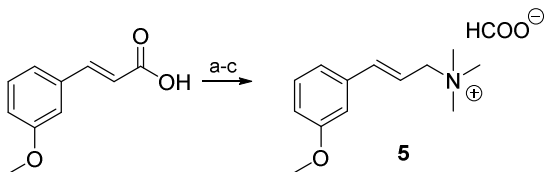

**Scheme S1.** Synthesis of compound **5**. *Reagents and conditions:* a)  $\text{HN}(\text{CH}_3)_2$ ,  $\text{Et}_3\text{N}$ , DMAP,  $\text{EDC}\cdot\text{HCl}$ ,  $\text{CH}_2\text{Cl}_2$ , r.t., 24 h; b)  $\text{LiAlH}_4$ , THF, r.t., 1 h; c)  $\text{MeI}$ , DMF, r.t., 16 h.

The olefin **5** (scheme 2) was synthesized according to the synthetic strategy of the dihydrobenzofuran **28**, starting from the commercially available 3-methoxy cinnamic acid.

### 3-(3-Methoxyphenyl)-*N,N*-dimethylacrylamide (**42**)<sup>6</sup>

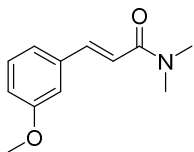

Compound **42** was synthesized according to the protocol of compound **40** using a solution of 3-methoxy cinnamic acid (414 mg, 2.32 mmol) in dry  $\text{CH}_2\text{Cl}_2$  (8 mL), dimethylamine (2 M in THF, 2.20 mL, 4.40 mmol), triethylamine (310  $\mu\text{L}$ , 2.24 mmol), *N,N*-dimethylaminopyridine (32.6 mg, 267  $\mu\text{mol}$ ) and 1-ethyl-3-(3-dimethylaminopropyl)carbodiimide hydrochloride (474 mg, 2.47 mmol). The reaction was stirred at room temperature for 24 h. Purification by column chromatography on silica gel ( $\text{CH}_2\text{Cl}_2/\text{MeOH}$ , 60:1) afforded **42** (368 mg, 77%) as colorless oil. IR (NaCl): 3450, 2962, 1650, 1605, 1493, 1397, 1260, 1159, 1046, 789, 742, 680  $\text{cm}^{-1}$ ;  $^1\text{H}$ -NMR (360 MHz,  $\text{CDCl}_3$ ):  $\delta$  7.65 (d,  $J$  = 15.4 Hz, 1H), 7.34–7.26 (m, 1H), 7.14 (d,  $J$  = 7.7 Hz,

1H), 7.09–7.04 (m, 1H), 6.95–6.84 (m, 2H), 3.85 (s, 3H), 3.14 (s, 6H);  $^{13}\text{C}$ -NMR (91 MHz,  $\text{CDCl}_3$ ):  $\delta$  168.1, 161.3, 143.7, 138.3, 131.2, 121.8, 119.3, 116.5, 114.6, 56.8, 32.8, 36.6; HPLC (254 nm, system 1):  $t_{\text{R}}$  = 18.5 min; ESI-MS: 206.2  $[\text{M}+\text{H}]^+$ .

### 3-(3-Methoxyphenyl)-*N,N*-dimethylprop-2-en-1-amine (**43**)<sup>7</sup>

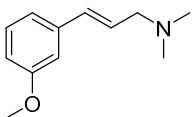

Compound **43** was synthesized according to the protocol of compound **41**, using  $\text{LiAlH}_4$  (4 M in THF, 400  $\mu\text{L}$ , 1.60 mmol) in dry THF (5 mL) and a solution of compound **42** (107 mg, 522  $\mu\text{mol}$ ) in dry THF (2 mL). The reaction time was 1 h. Evaporation of the solvent afforded **43** (74.1 mg, 75%) as colorless oil. IR (NaCl): 2942, 2773, 1599, 1581, 1489, 1465, 1264, 1155, 1043, 973, 774, 688  $\text{cm}^{-1}$ ;  $^1\text{H}$ -NMR (600 MHz,  $\text{CDCl}_3$ ):  $\delta$  7.24–7.20 (m, 1H), 6.97 (d,  $J$  = 7.5 Hz, 1H), 6.94–6.91 (m, 1H), 6.79 (dd,  $J$  = 8.1, 2.3 Hz, 1H), 6.49 (d,  $J$  = 15.8 Hz, 1H), 6.26 (dt,  $J$  = 15.8, 6.7 Hz, 1H), 3.81 (s, 3H), 3.08 (dd,  $J$  = 6.7, 1.0 Hz, 2H), 2.28 (s, 6H);  $^{13}\text{C}$ -NMR (91 MHz,  $\text{CDCl}_3$ ):  $\delta$  159.8, 138.5, 132.5, 129.5, 127.7, 119.0, 113.2, 111.5, 62.0, 55.2, 45.3; HPLC (254 nm, system A):  $t_{\text{R}}$  = 13.1 min; ESI-MS: 192.2  $[\text{M}+\text{H}]^+$ .

### 3-(3-Methoxyphenyl)-*N,N,N*-trimethylprop-2-en-1-aminium formate (**5**)

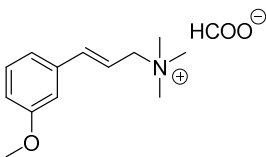

Compound **5** was synthesized according to the protocol of compound **1**, using a solution of compound **43** (7.4 mg, 38.6  $\mu\text{mol}$ ) in dry DMF (2 mL) and methyl iodide (10.0  $\mu\text{L}$ , 161  $\mu\text{mol}$ ). Purification by preparative HPLC (system 5) afforded **5** (4.4 mg, 47%) as white solid. IR (NaCl): 2957, 2760, 1597, 1485, 1351, 1259, 1159, 1038, 972, 890, 785, 689  $\text{cm}^{-1}$ ;  $^1\text{H}$ -NMR (600 MHz,  $\text{D}_2\text{O}$ ):  $\delta$  7.43–7.38 (m, 1H), 7.21 (d,  $J$  = 7.7 Hz, 1H), 7.17–7.14 (m, 1H), 7.03 (dd,  $J$  = 8.2, 2.3 Hz, 1H), 6.97 (d,  $J$  = 15.7 Hz, 1H), 6.44 (dt,  $J$  =



15.5, 7.7 Hz, 1H), 4.08 (d,  $J = 7.7$  Hz, 2H), 3.86 (s, 3H), 3.13 (s, 9H) ( $\text{HCOO}^-$  was not detected);  $^{13}\text{C}$ -NMR (91 MHz,  $\text{D}_2\text{O}$ ):  $\delta$  160.9, 144.2, 138.3, 131.9, 121.8, 117.3, 116.7, 114.1, 69.8, 57.1, 54.0 (t,  $J = 4.6$  Hz) ( $\text{HCOO}^-$  was not detected); HPLC (254 nm, system A):  $t_{\text{R}} = 11.9$  min, purity: 97%, (254 nm, system B):  $t_{\text{R}} = 11.9$  min, purity: 98%; HR-ESIMS: calcd 206.1539, found 206.1541  $[\text{M}]^+$ .

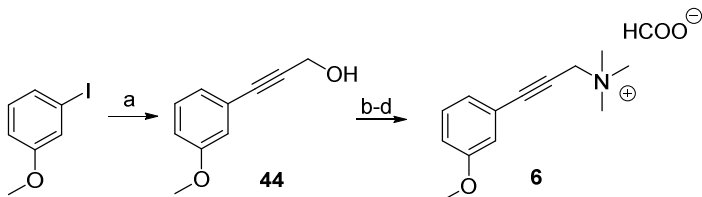

**Scheme S2.** Synthesis of compound **6**. *Reagents and conditions:* a) propargyl alcohol,  $\text{Pd}(\text{PPh}_3)_4$ ,  $\text{CuI}$ ,  $\text{Et}_3\text{N}$ , THF, r.t., 16 h; b)  $\text{MsCl}$ ,  $\text{Et}_3\text{N}$ ,  $\text{CH}_2\text{Cl}_2$ , r.t., 3 h; c)  $\text{HN}(\text{CH}_3)_2$ , DMF, r.t., 3 h, then  $50^\circ\text{C}$ , 16 h; d)  $\text{MeI}$ , DMF, r.t., 16 h.

For the synthesis of the alkyne **6** (scheme 3), 3-iodoanisole was first reacted in a palladium catalyzed Sonogashira coupling with propargyl alcohol and  $\text{CuI}$  to the phenyl acetylene <sup>8</sup>. In situ activation of the alcohol to the corresponding chloride <sup>9</sup> was followed by a nucleophilic substitution with *N,N*-dimethylamine to afford the tertiary amine <sup>10</sup> which was methylated to compound **6**.

### 3-(3-Methoxyphenyl)prop-2-yn-1-ol (**44**) <sup>8</sup>

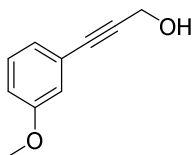

To a solution of tetrakis(triphenylphosphin)palladium(0) (94.2 mg, 81.6  $\mu\text{mol}$ ) and  $\text{CuI}$  (36.7 mg, 193  $\mu\text{mol}$ ) in dry THF (10 mL) were added under  $\text{N}_2$ -atmosphere triethylamine (0.5 mL) and 3-iodoanisole (200  $\mu\text{L}$ , 1.68 mmol). Subsequently, propargylalcohol (300  $\mu\text{L}$ , 5.19 mmol) was added dropwise and the reaction mixture was stirred at room temperature for 16 h. After evaporation, the crude residue was dissolved in  $\text{CHCl}_3$  and

the organic layer was washed once with saturated, aqueous  $\text{NH}_4\text{Cl}$  solution, once with saturated, aqueous  $\text{NaHCO}_3$  solution and once with saturated aqueous  $\text{NaCl}$  solution. The organic layer was dried ( $\text{Na}_2\text{SO}_4$ ). After evaporation, the crude residue was purified by column chromatography on silica gel ( $\text{CH}_2\text{Cl}_2$ ) to give **44** (280 mg, quant.) as pale yellow oil. IR (NaCl): 3365, 2939, 1604, 1576, 1481, 1420, 1319, 1290, 1206, 1165, 1043, 973, 855, 782, 687  $\text{cm}^{-1}$ ;  $^1\text{H}$ -NMR (600 MHz,  $\text{CDCl}_3$ ):  $\delta$  7.23–7.20 (m, 1H), 7.05–7.02 (m, 1H), 6.97 (dd,  $J$  = 2.5, 1.4 Hz, 1H), 6.88 (ddd,  $J$  = 8.4, 2.6, 0.8 Hz, 1H), 4.49 (s, 2H), 3.79 (s, 3H), 1.71 (s, 1H);  $^{13}\text{C}$ -NMR (151 MHz,  $\text{CDCl}_3$ ):  $\delta$  159.3, 129.4, 124.2, 123.5, 116.6, 115.1, 87.0, 85.6, 55.3, 51.7; HPLC (254 nm, system A):  $t_{\text{R}}$  = 18.0 min; ESI-MS: 163.2  $[\text{M}+\text{H}]^+$ .

### 1-(3-Chloroprop-1-yn-1-yl)-3-methoxybenzene (**45**)<sup>9</sup>

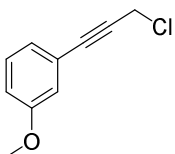

To a solution of compound **44** (110 mg, 679  $\mu\text{mol}$ ) and triethylamine (100  $\mu\text{L}$ , 723  $\mu\text{mol}$ ) in dry  $\text{CH}_2\text{Cl}_2$  (4 mL) was added methanesulfonyl chloride (60.0  $\mu\text{L}$ , 775  $\mu\text{mol}$ ) under  $\text{N}_2$ -atmosphere at 0  $^\circ\text{C}$ . The reaction mixture was stirred at 0  $^\circ\text{C}$  for 1 h, subsequently, additional methanesulfonyl chloride (50.0  $\mu\text{L}$ , 646  $\mu\text{mol}$ ) and triethylamine (100  $\mu\text{L}$ , 723  $\mu\text{mol}$ ) were added and the reaction was stirred at room temperature for 2 h. Saturated, aqueous  $\text{NH}_4\text{Cl}$  solution was added and the mixture was stirred for 10 min. The organic layer was washed twice with saturated, aqueous  $\text{NH}_4\text{Cl}$  solution and dried ( $\text{Na}_2\text{SO}_4$ ). After evaporation, the crude residue was purified by column chromatography on silica gel (*n*-hexane/ethyl acetate, 6:1) to give **45** (16.8 mg, 15%) as colorless oil. IR (NaCl): 2962, 2923, 1259, 1088, 1041, 1022, 865, 798, 686  $\text{cm}^{-1}$ ;  $^1\text{H}$ -NMR (360 MHz,  $\text{CDCl}_3$ ):  $\delta$  7.18–7.11 (m, 1H), 7.00–6.95 (m, 1H), 6.93–6.88 (m, 1H), 6.83 (ddd,  $J$  = 8.3, 2.6, 0.9 Hz, 1H), 4.31 (s, 2H), 3.73 (s, 3H);  $^{13}\text{C}$ -NMR (151 MHz,  $\text{CDCl}_3$ ):  $\delta$  158.3, 128.4, 123.4, 122.0, 115.6, 114.5, 85.2, 82.5, 54.3, 30.1; HPLC (254 nm, system A):  $t_{\text{R}}$  = 20.5 min; ESI-MS: 181.3  $[\text{M}+\text{H}]^+$ .

### 3-(3-Methoxyphenyl)-*N,N*-dimethylprop-2-yn-1-amine (**46**)<sup>10</sup>

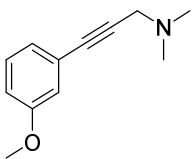

To a solution of compound **45** (12.0 mg, 66.4  $\mu\text{mol}$ ) in dry DMF (2 mL) was added dimethylamine (2 M in THF, 400  $\mu\text{L}$ , 800 mmol) under Ar-atmosphere. The reaction was stirred at room temperature for 3 h and then at 50 °C for 16 h. After cooling to room temperature, evaporation afforded **46** (12.4 mg, quant.) as pale, yellow oil. IR (NaCl): 3419, 2963, 1668, 1605, 1471, 1292, 1261, 1044, 913, 792, 736  $\text{cm}^{-1}$ ;  $^1\text{H}$ -NMR (600 MHz,  $\text{CDCl}_3$ ):  $\delta$  7.22–7.18 (m, 1H), 7.00 (d,  $J$  = 7.6 Hz, 1H), 6.94–6.92 (m, 1H), 6.91–6.87 (m, 1H), 4.02 (s, 2H), 3.75 (s, 3H), 2.81 (s, 6H);  $^{13}\text{C}$ -NMR (91 MHz,  $\text{CDCl}_3$ ):  $\delta$  158.5, 128.7, 123.5, 120.8, 116.0, 115.1, 89.6, 75.1, 54.4, 46.7, 41.1; HPLC (254 nm, system A):  $t_R$  = 14.2 min; ESI-MS: 190.2  $[\text{M}+\text{H}]^+$ .

### 3-(3-Methoxyphenyl)-*N,N,N*-trimethylprop-2-yn-1-aminium formate (**6**)

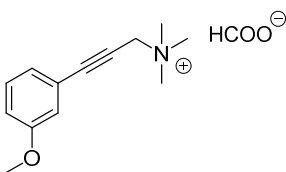

Compound **6** was synthesized according to the protocol of compound **1**, using a solution of compound **46** (8.6 mg, 45.4  $\mu\text{mol}$ ) in dry DMF (2 mL) and methyl iodide (20.0  $\mu\text{L}$ , 322  $\mu\text{mol}$ ). Purification by preparative HPLC (column 1, system 5) afforded **6** (3.4 mg, 28%) as white solid. IR (NaCl): 2989, 2901, 1394, 1066, 669  $\text{cm}^{-1}$ ;  $^1\text{H}$ -NMR (600 MHz,  $\text{D}_2\text{O}$ ):  $\delta$  8.47 (s, 1H), 7.42–7.37 (m, 1H), 7.23 (d,  $J$  = 7.6 Hz, 1H), 7.19 (s, 1H), 7.11 (dd,  $J$  = 8.4, 2.1 Hz, 1H), 4.47 (s, 2H), 3.84 (s, 3H), 3.27 (s, 9H);  $^{13}\text{C}$ -NMR (151 MHz,  $\text{D}_2\text{O}$ ):  $\delta$  171.5, 159.4, 130.7, 125.6, 122.1, 117.8, 117.0, 91.6, 76.9, 57.8, 56.1, 53.4 HPLC: (254 nm, system A):  $t_R$  = 12.5 min, purity: 97%, (254 nm, system B):  $t_R$  = 12.8 min, purity 98%, HR-ESIMS: calcd 204.1383, found 204.1382  $[\text{M}]^+$ .

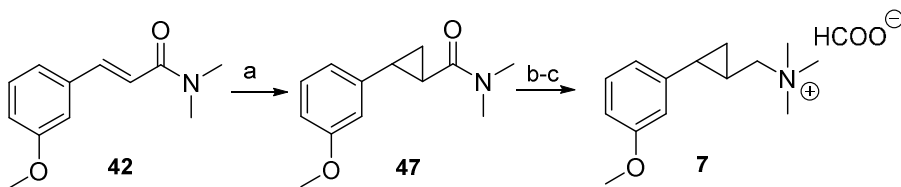

**Scheme S3.** Synthesis of compound **7**. *Reagents and conditions:* a)  $(\text{CH}_3)_3\text{SOI}$ , NaH, DMSO, r.t., 16 h; b)  $\text{LiAlH}_4$ , THF, r.t., 1 h; c) MeI, DMF, r.t., 16 h.

For the synthesis of the cyclopropyl based target compound, the amide **42**<sup>6</sup> was treated with trimethylsulfoxonium iodide and NaH in DMSO to give the cyclopropyl derivative **47** in 30% yield. The reduction of the amide with  $\text{LiAlH}_4$  was followed by methylation of the tertiary amine to the quaternary ammonium derivative **7**. Selective NOE experiments of the amide **47** proofed the trans conformation of the cyclopropane linker.

### 2-(3-Methoxyphenyl)-*N,N*-dimethylcyclopropane-1-carboxamide (**47**)

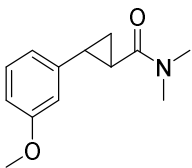

A mixture of NaH (60% suspension, 101 mg, 2.50 mmol) and trimethylsulfoxonium iodide (600 mg, 2.72 mmol) in dry DMSO (2 mL) was stirred under  $\text{N}_2$ -atmosphere at room temperature until a clear solution was obtained. Subsequently, a solution of compound **42** (150 mg, 731  $\mu\text{mol}$ ) in dry DMSO (2 mL) was added dropwise and the reaction was stirred at room temperature for 16 h. Water and  $\text{CHCl}_3$  were added and the aqueous layer was extracted three times with  $\text{CHCl}_3$ . The combined organic layers were dried ( $\text{Na}_2\text{SO}_4$ ). After evaporation, the crude residue was purified by column chromatography on silica gel (*n*-hexane/ethyl acetate, 2:1  $\rightarrow$  1:1) to give **47** (47.5 mg, 30%) as colorless oil. IR (NaCl): 2917, 1633, 1492, 1418, 1255, 1157, 1047, 913, 783, 695  $\text{cm}^{-1}$ ;  $^1\text{H}$ -NMR (600 MHz,  $\text{CDCl}_3$ ):  $\delta$  7.21–7.17 (m, 1H), 6.76–6.72 (m, 1H), 6.71 (d,  $J$  = 7.6 Hz, 1H), 6.69–6.65 (m, 1H), 3.80 (s, 3H), 3.13 (s, 3H), 2.99 (s, 3H), 2.45 (ddd,  $J$  = 9.1, 6.2, 4.3 Hz, 1H), 1.98 (ddd,  $J$  = 8.3, 5.3, 4.3 Hz, 1H), 1.63 (ddd,  $J$  = 9.6, 8.5, 5.9 Hz, 1H), 1.25 (ddd,  $J$  = 8.3, 6.2, 4.3 Hz, 1H);  $^{13}\text{C}$ -NMR (91 MHz,  $\text{CDCl}_3$ ):  $\delta$  171.9,

159.8, 143.0, 129.4, 118.4, 112.2, 111.4, 55.2, 37.3, 35.9, 25.5, 23.2, 16.3; HPLC (254 nm, system A):  $t_R$  = 18.0 min; ESI-MS: 220.3  $[M+H]^+$ .

**1-(2-(3-Methoxyphenyl)cyclopropyl)-*N,N*-dimethylmethanamine (48)**

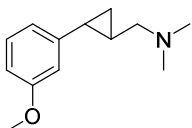

Compound **48** was synthesized according to the protocol of compound **41** using  $\text{LiAlH}_4$  (4 M in THF, 150  $\mu\text{L}$ , 600  $\mu\text{mol}$ ) in dry THF (3 mL) and a solution of compound **47** (40.0 mg, 183  $\mu\text{mol}$ ) in dry THF (1 mL). The reaction time was 1 h. Evaporation of the solvent afforded **48** (35.1 mg, 95%) as colorless oil. IR (NaCl): 2771, 1604, 1458, 1263, 1156, 1043, 739, 694  $\text{cm}^{-1}$ ;  $^1\text{H}$ -NMR (360 MHz,  $\text{CDCl}_3$ ):  $\delta$  7.19–7.12 (m, 1H), 6.72–6.64 (m, 2H), 6.63–6.59 (m, 1H), 3.78 (s, 3H), 2.41 (dd,  $J$  = 12.5, 6.3 Hz, 1H), 2.33–2.25 (m, 7H), 1.72–1.63 (m, 1H), 1.29–1.18 (m, 1H), 1.02–0.93 (m, 1H), 0.87–0.79 (m, 1H);  $^{13}\text{C}$ -NMR (151 MHz,  $\text{CDCl}_3$ ):  $\delta$  159.7, 144.7, 129.3, 118.2, 111.6, 110.7, 63.9, 55.2, 45.4, 22.7, 21.5, 15.1; HPLC (254 nm, system A):  $t_R$  = 4.9 min; ESI-MS: 206.2  $[M+H]^+$ .

**1-(2-(3-Methoxyphenyl)cyclopropyl)-*N,N,N*-trimethylmethanaminium formate (7)**

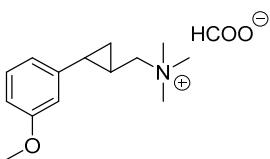

Compound **7** was synthesized according to the protocol of compound **1**, using a solution of compound **48** (11.0 mg, 53.6  $\mu\text{mol}$ ) in dry DMF (2 mL) and methyl iodide (10.0  $\mu\text{L}$ , 161  $\mu\text{mol}$ ). Purification by preparative HPLC (system 2) afforded **7** (6.5 mg, 47%) as white solid. IR (NaCl): 3389, 2989, 2900, 1603, 1394, 1256, 1066, 1051, 879  $\text{cm}^{-1}$ ;  $^1\text{H}$ -NMR (600 MHz,  $\text{D}_2\text{O}$ ):  $\delta$  8.76 (s, 1H), 7.34–7.29 (m, 1H), 6.91–6.87 (m, 1H), 6.83 (d,  $J$  = 7.7 Hz, 1H), 6.81–6.77 (m, 1H), 3.83 (s, 3H), 3.48 (dd,  $J$  = 13.4, 6.6 Hz, 1H), 3.36 (dd,  $J$  = 13.6, 7.9 Hz, 1H), 3.16 (s, 9H), 2.11–2.05 (m, 1H), 1.54–1.47 (m, 1H), 1.34 (dt,  $J$  = 8.7, 5.6 Hz, 1H), 1.15 (dt,  $J$  = 9.1, 5.5 Hz, 1H);  $^{13}\text{C}$ -NMR (151 MHz,  $\text{D}_2\text{O}$ ):  $\delta$  171.1,

159.9, 143.4, 130.8, 119.1, 112.5, 112.3, 70.7, 56.0, 53.5 (t,  $J = 4.5$  Hz), 23.0, 17.1, 14.5; HPLC (220 nm, system A):  $t_R = 15.3$  min, purity: 97%, (220 nm, system B):  $t_R = 14.1$  min, purity: 96%; ESI-MS: 220.4  $[M]^+$ .

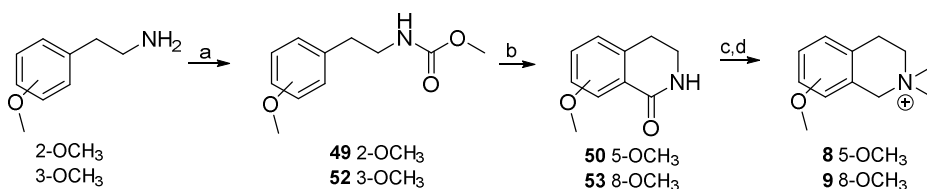

**Scheme S4.** Synthesis of compound **8** and **9**. *Reagents and conditions:* a) methyl chloroformate, Et<sub>3</sub>N, THF, r.t., 5–24 h; b) PPA, 145 °C, 10 min; c) LiAlH<sub>4</sub>, THF, reflux, 3 h; d) MeI, K<sub>2</sub>CO<sub>3</sub>, DMF, r.t., 16 h.

The tetrahydroisoquinoline derivatives and **8**<sup>11</sup> and **9** (scheme 5) were synthesized starting from 3- and 2-methoxy phenethylamine, respectively. The synthesis of the carbamates **49**<sup>12</sup> and **52**<sup>13</sup> was followed by cyclisation in polyphosphoric acid at 145 °C to give the lactames **50**<sup>14</sup> and **53**<sup>13</sup>. After reduction with LiAlH<sub>4</sub>, the quaternary tetrahydroisoquinolines **8** and **9** were obtained by alkylation with methyl iodide and K<sub>2</sub>CO<sub>3</sub> as base.

#### Methyl (2-methoxyphenethyl)carbamate (**49**)<sup>12</sup>

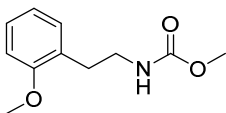

Compound **49** was synthesized according to the protocol of compound **52** using a solution of 2-(2-methoxyphenyl)-ethylamine (500  $\mu$ L, 3.31 mmol) and triethylamine (550  $\mu$ L, 4.00 mmol) in dry THF (15 mL) and methylchloroformate (1.30 mL, 16.7 mmol). The reaction time was 5 h. Evaporation of the solvent gave **49** (680 mg, 98%) as pale yellow oil. IR (NaCl): 3336, 2958, 2837, 1705, 1602, 1533, 1495, 1465, 1244, 1121, 1029, 755  $\text{cm}^{-1}$ ; <sup>1</sup>H-NMR (600 MHz, CDCl<sub>3</sub>):  $\delta$  7.15 (td,  $J = 8.0, 1.6$  Hz, 1H), 7.05 (d,  $J = 7.1$  Hz, 1H), 6.85–6.81 (m, 1H), 6.79 (d,  $J = 8.2$  Hz, 1H), 4.72 (bs, 1H), 3.76 (s, 3H), 3.57 (s,  $J = 16.9$  Hz, 3H), 3.38–3.31 (m, 2H), 2.78–2.72 (m, 2H); <sup>13</sup>C-NMR

(151 MHz, CDCl<sub>3</sub>):  $\delta$  157.6, 157.0, 130.6, 127.9, 127.3, 120.6, 110.4, 55.3, 51.9, 41.2, 30.7; HPLC (254 nm, system A):  $t_R$  = 19.0 min; ESI-MS: 232.3 [M+Na]<sup>+</sup>.

#### 5-Methoxy-3,4-dihydroisoquinolin-1(2H)-one (**50**)<sup>14</sup>

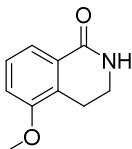

Compound **50** was synthesized according to the protocol of compound **53** using polyphosphoric acid (4.0 g) and compound **49** (247 mg, 1.18 mmol). Purification by column chromatography on silica gel (ethyl acetate/MeOH, 19:1) afforded **50** (40.0 mg, 22%) as colorless oil. IR (NaCl): 3389, 3194, 2967, 1676, 1583, 1489, 1414, 1347, 1267, 1222, 1053, 753 cm<sup>-1</sup>; <sup>1</sup>H-NMR (360 MHz, CDCl<sub>3</sub>):  $\delta$  7.70 (dd,  $J$  = 7.8, 0.8 Hz, 1H), 7.36–7.27 (m, 1H), 7.01 (dd,  $J$  = 8.2, 0.8 Hz, 1H), 6.06 (bs, 1H), 3.86 (s, 3H), 3.53 (td,  $J$  = 6.7, 2.9 Hz, 2H), 2.97 (t,  $J$  = 6.7 Hz, 2H); <sup>13</sup>C-NMR (91 MHz, CDCl<sub>3</sub>):  $\delta$  166.4, 155.8, 130.1, 127.8, 127.4, 120.1, 113.8, 55.8, 40.1, 21.7; HPLC (254 nm, system A):  $t_R$  = 16.2 min; ESI-MS: 200.2 [M+Na]<sup>+</sup>.

#### 5-Methoxy-1,2,3,4-tetrahydroisoquinoline (**51**)<sup>15</sup>

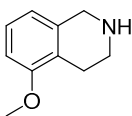

Compound **51** was synthesized according to the protocol of compound **41** using LiAlH<sub>4</sub> (4 M in THF, 100  $\mu$ L, 400  $\mu$ mol) in dry THF (5 mL) and a solution of compound **50** (18.0 mg, 102  $\mu$ mol) in dry THF (4 mL). The reaction time was 3 h. Purification by column chromatography on silica gel (CH<sub>2</sub>Cl<sub>2</sub>/MeOH/NH<sub>3</sub> aqu. 25%, 10:1:0.01) afforded **51** (11.8 mg, 70%) as pale yellow oil. IR (NaCl): 2920, 2849, 2360, 1590, 1469, 1259, 1098, 1013, 773 cm<sup>-1</sup>; <sup>1</sup>H-NMR (360 MHz, CDCl<sub>3</sub>):  $\delta$  7.13–7.06 (m, 1H), 6.68 (d,  $J$  = 8.1 Hz, 1H), 6.64 (d,  $J$  = 7.7 Hz, 1H), 4.00 (s, 2H), 3.82 (s, 3H), 3.15 (t,  $J$  = 6.1 Hz, 2H), 2.68 (t,  $J$  = 6.0 Hz, 2H) (NH was not detected); <sup>13</sup>C-NMR (151 MHz, CDCl<sub>3</sub>):  $\delta$  157.4, 136.7,

126.2, 123.5, 118.4, 107.4, 55.3, 48.1, 43.6, 23.2; HPLC (254 nm system A):  $t_R$  = 7.5 min; ESI-MS: 164.3  $[M+H]^+$ .

### 5-Methoxy-2,2-dimethyl-1,2,3,4-tetrahydroisoquinolin-2-ium formate (**8**)<sup>11</sup>

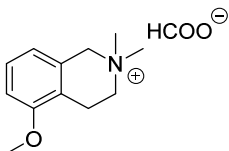

Compound **8** was synthesized according to the protocol of compound **1** using a solution of compound **51** (9.0 mg, 55.2  $\mu$ mol) in dry DMF (2 mL), methyl iodide (30.0  $\mu$ L, 483  $\mu$ mol) and  $K_2CO_3$  (30.0 mg, 217  $\mu$ mol). Purification by preparative HPLC (system 2) afforded **8** (10.4 mg, 80%) as white solid. IR (NaCl): 3396, 2935, 1682, 1595, 1474, 1353, 1267, 1200, 1098, 1005, 914, 775  $cm^{-1}$ ;  $^1H$ -NMR (600 MHz,  $D_2O$ ):  $\delta$  9.26 (bs, 1H), 7.41–7.32 (m, 1H), 7.05 (d,  $J$  = 8.2 Hz, 1H), 6.83 (d,  $J$  = 7.7 Hz, 1H), 4.56 (s, 2H), 3.89 (s, 3H), 3.71 (t,  $J$  = 6.5 Hz, 2H), 3.20 (s, 6H), 3.09 (t,  $J$  = 6.3 Hz, 2H);  $^{13}C$ -NMR (91 MHz,  $D_2O$ ):  $\delta$  171.1, 157.4, 129.2, 128.2, 119.7, 118.6, 111.2, 63.8, 60.2, 56.3, 51.8, 19.7; HPLC (220 nm, system A):  $t_R$  = 10.4 min, purity: > 99%, (220 nm, system B):  $t_R$  = 10.8 min, purity: > 99%; HR-ESIMS: calcd 192.1383, found 192.1385  $[M]^+$ .

### Methyl (3-methoxyphenethyl)carbamate (**52**)<sup>13</sup>

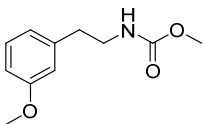

A solution of 2-(3-methoxyphenyl)-ethylamine (500  $\mu$ L, 3.31 mmol) and triethylamine (550  $\mu$ L, 4.00 mmol) in dry THF (15 mL) was cooled under Ar-atmosphere to 0  $^{\circ}C$ . Subsequently, methylchloroformate (1.30 mL, 16.7 mmol) was added dropwise and the reaction mixture was stirred at room temperature for 24 h. Subsequently, water was added and the aqueous phase was extracted three times with  $CHCl_3$ . The combined organic layers were washed with saturated, aqueous NaCl solution, dried ( $Na_2SO_4$ ) and the solvent was evaporated to give **52** (700 mg, quant.) as yellow oil. IR (NaCl): 3337,



2948, 2837, 1706, 1602, 1527, 1495, 1244, 1121, 1049, 1029, 754  $\text{cm}^{-1}$ ;  $^1\text{H}$ -NMR (600 MHz,  $\text{CDCl}_3$ ):  $\delta$  7.24–7.20 (m, 1H), 6.80–6.76 (m, 2H), 6.75–6.71 (m, 1H), 4.68 (bs, 1H), 3.80 (s, 3H), 3.66 (s, 3H), 3.48–3.39 (m, 2H), 2.83–2.74 (m, 2H);  $^{13}\text{C}$ -NMR (91 MHz,  $\text{CDCl}_3$ ):  $\delta$  159.9, 157.0, 140.4, 129.6, 121.1, 114.5, 111.9, 55.2, 52.1, 42.1, 36.2; HPLC (254 nm, system A):  $t_R$  = 13.3 min; ESI-MS: 323.2  $[\text{M}+\text{Na}]^+$ .

### 8-Methoxy-3,4-dihydroisoquinolin-1(2H)-one (**53**)<sup>13</sup>

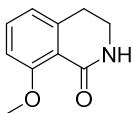

Polyphosphoric acid (5.0 g) was heated to 145°C. Subsequently, compound **52** (400 mg, 1.90 mmol) was added and the reaction mixture was stirred at 145 °C for 10 minutes. Iced cooled water was added and the aqueous phase was extracted three times with  $\text{CHCl}_3$ . The combined organic layers were washed with saturated, aqueous NaCl solution and dried ( $\text{Na}_2\text{SO}_4$ ). After evaporation, the crude residue was purified by column chromatography on silica gel (ethyl acetate/MeOH, 19:1) to give **53** (45.0 mg, 13%) as pale yellow solid. Mp: 144–146 °C; IR (NaCl): 3192, 2938, 1655, 1603, 1478, 1319, 1275, 1252, 1158, 1026, 844, 782  $\text{cm}^{-1}$ ;  $^1\text{H}$ -NMR (600 MHz,  $\text{CDCl}_3$ ):  $\delta$  7.40–7.34 (m, 1H), 6.90 (d,  $J$  = 8.4 Hz, 1H), 6.81 (d,  $J$  = 7.5 Hz, 1H), 6.45 (bs, 1H), 3.94 (s, 3H), 3.46 (td,  $J$  = 6.3, 3.6 Hz, 2H), 2.96–2.90 (m, 2H);  $^{13}\text{C}$ -NMR (91 MHz,  $\text{CDCl}_3$ ):  $\delta$  165.1, 160.1, 142.0, 132.7, 119.5, 117.7, 110.9, 56.2, 39.8, 30.2; HPLC (254 nm, system A):  $t_R$  = 15.3 min; ESI-MS: 178.3  $[\text{M}+\text{H}]^+$ .

### 8-Methoxy-1,2,3,4-tetrahydroisoquinoline (**54**)<sup>13</sup>

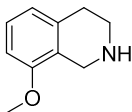

Compound **54** was synthesized according to the protocol of compound **41** using  $\text{LiAlH}_4$  (4 M in THF, 100  $\mu\text{L}$ , 400  $\mu\text{mol}$ ) in dry THF (5 mL) and a solution of compound **53** (45.0 mg, 254  $\mu\text{mol}$ ) in dry THF (4 mL). The reaction time was 3 h. Purification by

column chromatography on silica gel (CH<sub>2</sub>Cl<sub>2</sub>/MeOH/NH<sub>3</sub> aqu. 25%, 20:1:0.02) afforded **54** (25.0 mg, 61%) as pale yellow oil. IR (NaCl): 2920, 2849, 2723, 2468, 2361, 1589, 1469, 1258, 1098, 1013, 773 cm<sup>-1</sup>; <sup>1</sup>H-NMR (600 MHz, CDCl<sub>3</sub>): δ 7.14–7.09 (m, 1H), 6.71 (d, *J* = 7.6 Hz, 1H), 6.67 (d, *J* = 8.1 Hz, 1H), 3.98 (s, 2H), 3.80 (s, 3H), 3.12 (t, *J* = 5.9 Hz, 2H), 2.81 (t, *J* = 5.8 Hz, 2H), 2.25 (bs, 1H); <sup>13</sup>C-NMR (151 MHz, CDCl<sub>3</sub>): δ 156.0, 135.8, 126.5, 124.0, 121.4, 107.1, 55.2, 43.1, 43.1, 28.9; HPLC (254 nm, system A): t<sub>R</sub> = 10.9 min; ESI-MS: 164.3 [M+H]<sup>+</sup>.

### 8-Methoxy-2,2-dimethyl-1,2,3,4-tetrahydroisoquinolin-2-ium formate (**9**)

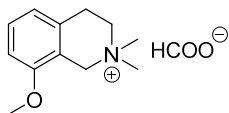

Compound **9** was synthesized according to the protocol of compound **1** using a solution of compound **54** (12.0 mg, 73.6 μmol) in dry DMF (2 mL), methyl iodide (30.0 μL, 483 μmol) and K<sub>2</sub>CO<sub>3</sub> (30.2 mg, 218 μmol). Purification by preparative HPLC (system 3) afforded **9** (10.0 mg, 58%) as white solid. IR (NaCl): 3000, 1593, 1473, 1267, 1096, 941, 779 cm<sup>-1</sup>; <sup>1</sup>H-NMR (600 MHz, D<sub>2</sub>O): δ 8.44 (s, 1H), 7.43–7.31 (m, 1H), 7.02–6.91 (m, 2H), 4.50 (s, 2H), 3.86 (s, 3H), 3.67 (t, *J* = 6.5 Hz, 2H), 3.24 (t, *J* = 6.2 Hz, 2H), 3.21 (s, 6H); <sup>13</sup>C-NMR (91 MHz, D<sub>2</sub>O): δ 171.5, 156.6, 130.9, 129.9, 121.2, 115.7, 109.7, 59.7, 56.2, 52.2, 30.5, 23.9; HPLC (220 nm, system A): t<sub>R</sub> = 11.3 min, purity: > 99%, (220 nm system B): t<sub>R</sub> = 11.3 min, purity: > 99%; HR-ESIMS: calcd 192.1383, found 192.1383 [M]<sup>+</sup>.

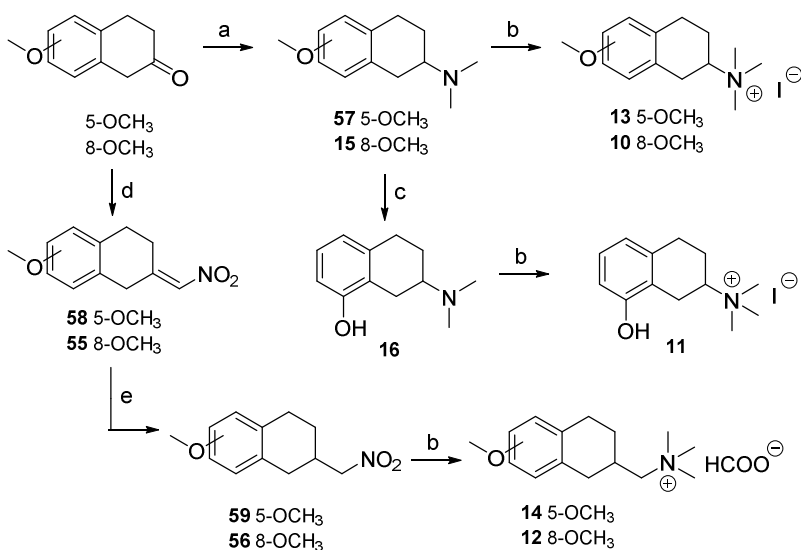

**Scheme S5.** Synthesis of compound **10** - **16**. *Reagents and conditions:* a)  $\text{HN}(\text{CH}_3)_2$ , AcOH, sodium triacetoxymethylborohydride, THF, r.t., 16–18 h; b) MeI,  $\text{CHCl}_3$ , r.t., 16 h; c) HBr (48% aqueous solution), reflux, 2 h; d) AcOH,  $\text{NH}_4\text{OAc}$ ,  $\text{CH}_3\text{NO}_2$ , reflux, 4–5 h; e)  $\text{LiAlH}_4$ , THF, r.t., 4–8 h.

The quarternary aminotetralin ions **10** - **15** were synthesized starting from 8-methoxy-2-tetralone and 5-methoxy-2-tetralone, respectively (scheme 6). For compound **10**, **11** and **13** the first step was a reductive amination of these ketones with *N,N*-dimethylamine and sodium triacetoxymethylborohydride in THF, giving the tertiary amines **15**<sup>16</sup> and **57**<sup>17</sup>. Subsequently, these tertiary amines were alkylated with methyl iodide at room temperature to give the salts **10** and **13**. For the synthesis of the hydroxy derivative **11**, the methoxy group was cleaved under reflux conditions in aqueous HBr and subsequently, the tertiary amine **16**<sup>18</sup> was methylated to give the phenol **11** with an overall yield of 60%.

The synthesis of the homolog quarternary ammonium derivative **12** and **14** started with an Henry reaction of the corresponding tetralone in nitromethane with acetic acid and ammonium acetate to give the nitro olefins **55** und **58**<sup>19</sup>. Reduction with  $\text{LiAlH}_4$  to primary amines **56** and **59** was followed by alkylation with methyl iodide in DMF at room temperature. Purification with preparative HPLC gave the quarternary ammonium derivatives **12** and **14** with a yield of 41% and 90%, respectively.

### 8-Methoxy-*N,N,N*-trimethyl-1,2,3,4-tetrahydronaphthalen-2-aminium iodide (**10**)

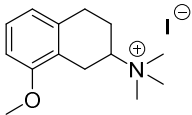

Compound **10** was prepared according to the protocol of compound **1**, using a solution of compound **15** (15.0 mg, 73.1 mmol) in dry CHCl<sub>3</sub> (2 mL) and methyl iodide (10.0 μL, 161 μmol). The compound was dissolved in MeOH and precipitated with diethyl ether to afford **10** (12.8 mg, 51%) as pale yellow solid. Mp: 230–234 °C; IR (NaCl): 2900, 1559, 1472, 1340, 1259, 1066, 780, 669 cm<sup>-1</sup>; <sup>1</sup>H-NMR (600 MHz, DMSO): δ 7.18–7.13 (m, 1H), 6.83 (d, *J* = 8.1 Hz, 1H), 6.76 (d, *J* = 7.7 Hz, 1H), 3.80 (s, 3H), 3.76–3.69 (m, 1H), 3.19–3.14 (m, 2H), 3.12 (s, 9H), 2.99–2.93 (m, 1H), 2.88–2.80 (m, 1H), 2.76 (dd, *J* = 15.3, 12.3 Hz, 1H), 2.44–2.37 (m, 1H), 1.72 (qd, *J* = 12.3, 4.9 Hz, 1H); <sup>13</sup>C-NMR (151 MHz, DMSO): δ 156.8, 135.7, 127.0, 121.0, 120.2, 107.6, 70.3, 55.2, 50.3 (t, *J* = 3.0 Hz), 28.4, 23.2, 22.4; HPLC (220 nm, system A): *t*<sub>R</sub> = 11.6 min, purity: 98%, (220 nm, system B): *t*<sub>R</sub> = 12.4 min, purity: > 99%; HR-ESIMS: calcd 220.1696, found 220.1700 [M]<sup>+</sup>.

### 8-Hydroxy-*N,N,N*-trimethyl-1,2,3,4-tetrahydronaphthalen-2-aminium iodide (**11**)

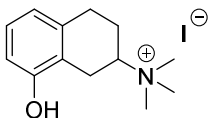

Compound **11** was prepared according to the protocol of compound **1**, using a solution of compound **16** (16.1 mg, 84.2 mmol) in dry CHCl<sub>3</sub> (2 mL) and methyl iodide (10.0 μL, 161 μmol). The compound was dissolved in MeOH and precipitated with diethyl ether to afford **11** (10.0 mg, 38%) as white solid. IR (NaCl): 3234, 2971, 1588, 1465, 1394, 1242, 1066, 669 cm<sup>-1</sup>; <sup>1</sup>H-NMR (600 MHz, D<sub>2</sub>O): δ 7.15–7.10 (m, 1H), 6.79 (d, *J* = 7.6 Hz, 1H), 6.77 (d, *J* = 8.0 Hz, 1H), 3.77–3.70 (m, 1H), 3.34–3.29 (m, 1H), 3.19 (s, 9H), 3.08–3.02 (m, 1H), 2.95–2.87 (m, 1H), 2.85–2.78 (m, 1H), 2.49–2.43 (m, 1H), 1.84 (qd, *J* = 12.3, 4.9 Hz, 1H); <sup>13</sup>C-NMR (151 MHz, D<sub>2</sub>O): δ 154.6, 137.4, 128.2, 120.6, 120.5, 113.1, 72.3, 51.4 (t, *J* = 3.0 Hz), 29.0, 24.1, 23.5; HPLC (220 nm, system A): *t*<sub>R</sub> = 9.8 min,

purity: 97%, (220 nm, system B):  $t_R$  = 10.4 min, purity: 97%; HR-ESIMS: calcd 206.1539, found 206.1540  $[M]^+$ .

### 8-Methoxy-2-(nitromethylene)-1,2,3,4-tetrahydronaphthalene (**55**)<sup>19</sup>

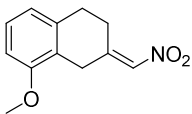

To a solution of 8-methoxy-2-tetralone (200 mg, 1.14 mmol) in nitromethane (5 mL) were added acetic acid (50.0  $\mu$ L, 874  $\mu$ mol) and ammonium acetate (90.0 mg, 1.18 mmol). The reaction mixture was stirred under reflux conditions for 5 h and was then allowed to cool to room temperature. Subsequently, water was added and the aqueous phase was extracted three times with  $\text{CH}_2\text{Cl}_2$ . The combined organic layers were washed with saturated, aqueous NaCl solution and dried ( $\text{Na}_2\text{SO}_4$ ). After evaporation, the crude residue was purified by column chromatography on silica gel (*n*-hexane/ethyl acetate, 6:1) to give **55** (216 mg, 87%) as yellow oil. IR (NaCl): 2939, 2837, 1668, 1551, 1473, 1368, 1266, 1156, 1082, 773  $\text{cm}^{-1}$ ;  $^1\text{H}$ -NMR (600 MHz,  $\text{CDCl}_3$ ):  $\delta$  7.18–7.14 (m, 1H), 7.04–7.02 (m, 1H), 6.77–6.72 (m, 2H), 5.06 (s, 2H), 3.83 (s, 3H), 2.89–2.85 (m, 2H), 2.40 (t,  $J$  = 8.2 Hz, 2H);  $^{13}\text{C}$ -NMR (91 MHz,  $\text{CDCl}_3$ ):  $\delta$  156.7, 155.4, 136.8, 129.2, 127.8, 126.3, 120.1, 109.1, 55.5, 28.0, 27.4, 25.1; HPLC (254 nm, system A):  $t_R$  = 20.4 min; ESI-MS: 173.3  $[M-\text{NO}_2]^+$ .

### (8-Methoxy-1,2,3,4-tetrahydronaphthalen-2-yl)methanamine (**56**)<sup>19</sup>

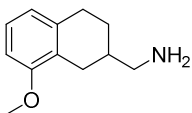

$\text{LiAlH}_4$  (2.8 M in THF, 1.16 mL, 3.25 mmol) was dissolved under Ar-atmosphere in dry THF (5 mL) and cooled to 0  $^\circ\text{C}$ . A solution of compound **55** (106 mg, 484  $\mu$ mol) in dry THF (2 mL) was added dropwise and the mixture was stirred at room temperature for 18 h. Subsequently, the reaction was quenched with aqueous NaOH solution (1 M) and the precipitate was removed by filtration. After evaporation, the crude residue was

purified by column chromatography on silica gel (CH<sub>2</sub>Cl<sub>2</sub>/MeOH/NH<sub>3</sub> aqu. 25%, 10:1:0.01) to give **56** (24.0 mg, 28%) as pale yellow oil. IR (NaCl): 3441, 2927, 2837, 1585, 1470, 1325, 1254, 1072, 768 cm<sup>-1</sup>; <sup>1</sup>H-NMR (600 MHz, CDCl<sub>3</sub>): δ 7.10–7.06 (m, 1H), 6.72 (d, *J* = 7.6 Hz, 1H), 6.66 (d, *J* = 8.1 Hz, 1H), 3.82 (s, 3H), 2.98–2.91 (m, 1H), 2.87–2.69 (m, 4H), 2.19–2.11 (m, 1H), 2.01–1.92 (m, 1H), 1.76–1.67 (m, 1H), 1.39–1.30 (m, 1H); <sup>13</sup>C-NMR (151 MHz, CDCl<sub>3</sub>): δ 157.4, 138.2, 125.9, 121.7, 121.1, 106.8, 55.4, 55.2, 29.7, 29.2, 27.6, 26.7; HPLC (254 nm, system A): *t*<sub>R</sub> = 14.7 min; ESI-MS: 192.2 [M+H]<sup>+</sup>.

**1-(8-Methoxy-1,2,3,4-tetrahydronaphthalen-2-yl)-*N,N,N*-trimethylmethanaminium formate (12)**

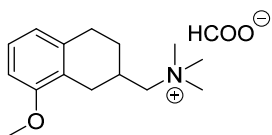

Compound **12** was prepared according to the protocol of compound **1** using a solution of compound **56** (10.0 mg, 52.3 μmol) in dry DMF (2 mL) and methyl iodide (40.0 μL, 644 μmol) and K<sub>2</sub>CO<sub>3</sub> (33.9 mg, 246 μmol). Purification by preparative HPLC (system 1) afforded **12** (6.0 mg, 41%) as pale yellow semi solid substance. IR (NaCl): 2989, 2900, 1559, 1507, 1394, 1250, 1066, 892 cm<sup>-1</sup>; <sup>1</sup>H-NMR (600 MHz, D<sub>2</sub>O): δ 8.44 (s, 1H), 7.24–7.20 (m, 1H), 6.88 (d, *J* = 8.1 Hz, 1H), 6.85 (d, *J* = 7.7 Hz, 1H), 3.84 (s, 3H), 3.49–3.37 (m, 2H), 3.20 (s, 9H), 3.08–3.02 (m, 1H), 2.94–2.82 (m, 2H), 2.45–2.31 (m, 2H), 2.08–2.02 (m, 1H), 1.66–1.56 (m, 1H); <sup>13</sup>C-NMR (151 MHz, D<sub>2</sub>O): δ 171.6, 157.4, 138.1, 127.5, 123.9, 121.9, 108.7, 73.0, 56.1, 53.9 (t, *J* = 4.5 Hz), 29.7, 29.6, 28.9, 28.4; HPLC (220 nm, system A): *t*<sub>R</sub> = 15.0 min, purity: 98%, (220 nm system B): *t*<sub>R</sub> = 13.5 min, purity: 97%; HR-ESIMS: calcd 234.1852, found 234.1851 [M]<sup>+</sup>.

**5-Methoxy-*N,N*-dimethyl-1,2,3,4-tetrahydronaphthalen-2-amine (57)**<sup>17</sup>

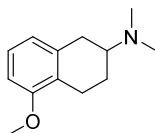

Compound **57** was prepared according to the protocol of compound **39** using a solution of 5-methoxy-2-tetralone (222 mg, 1.26 mmol) in dry THF (5 mL), dimethylamine (2 M in THF, 2.00 mL, 4.00 mmol), acetic acid (80.0  $\mu$ L, 1.33 mmol) and sodium triacetoxyborohydride (600 mg, 2.83 mmol). Purification by column chromatography on silica gel ( $\text{CH}_2\text{Cl}_2/\text{MeOH}/\text{NH}_3$  aqu. 25%, 10:1:0.01) afforded **57** (188 mg, 72%) as pale yellow oil. IR (NaCl): 2937, 2835, 1587, 1469, 1262, 1094, 767  $\text{cm}^{-1}$ ;  $^1\text{H}$ -NMR (360 MHz,  $\text{CDCl}_3$ ):  $\delta$  7.12–7.05 (m, 1H), 6.71 (d,  $J = 7.6$  Hz, 1H), 6.65 (d,  $J = 8.1$  Hz, 1H), 3.81 (s, 3H), 3.03–2.90 (m, 2H), 2.82–2.71 (m, 1H), 2.65–2.47 (m, 2H), 2.39 (s, 6H), 2.21–2.11 (m, 1H), 1.64–1.50 (m, 1H);  $^{13}\text{C}$ -NMR (91 MHz,  $\text{CDCl}_3$ ):  $\delta$  157.2, 136.2, 126.4, 124.7, 121.5, 107.3, 60.9, 55.3, 41.2, 31.7, 25.2, 23.0; HPLC (254 nm, system A):  $t_R = 12.0$  min; ESI-MS: 206.2  $[\text{M}+\text{H}]^+$ .

#### 5-Methoxy-*N,N,N*-trimethyl-1,2,3,4-tetrahydronaphthalen-2-aminium iodide (**13**)

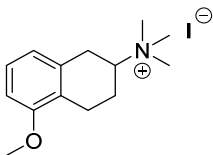

Compound **13** was prepared according to the protocol of compound **1**, using a solution of compound **57** (37.0 mg, 180  $\mu$ mol) in dry  $\text{CHCl}_3$  (2 mL) and methyl iodide (30.0  $\mu$ L, 483  $\mu$ mol). The compound was dissolved in  $\text{CHCl}_3$  and precipitated with diethyl ether to afford **13** (38.3 mg, 61%) as pale yellow solid. Mp: 233–235  $^\circ\text{C}$ ; IR (NaCl): 3424, 2971, 1589, 1470, 1259, 1066, 887, 779  $\text{cm}^{-1}$ ;  $^1\text{H}$ -NMR (600 MHz,  $\text{D}_2\text{O}$ ):  $\delta$  7.29–7.21 (m, 1H), 6.92 (d,  $J = 8.2$  Hz, 1H), 6.88 (d,  $J = 7.7$  Hz, 1H), 3.85 (s, 3H), 3.76–3.66 (m, 1H), 3.37–3.30 (m, 1H), 3.17 (s, 9H), 3.15–3.08 (m, 2H), 2.63 (ddd,  $J = 17.6, 12.2, 5.6$  Hz, 1H), 2.56–2.46 (m, 1H), 1.82 (qd,  $J = 12.2, 5.4$  Hz, 1H);  $^{13}\text{C}$ -NMR (91 MHz,  $\text{D}_2\text{O}$ ):  $\delta$  157.2, 134.6, 128.1, 124.1, 122.5, 109.6, 71.8, 56.3, 51.4 (t,  $J = 4.6$  Hz), 29.6, 23.4, 23.4. HPLC (254 nm, system A):  $t_R = 12.2$  min, purity: 98%, (254 nm, system B):  $t_R = 11.7$  min, purity: 99%; HR-ESIMS: calcd 220.1696, found 220.1699  $[\text{M}]^+$ .

#### 5-Methoxy-2-(nitromethylene)-1,2,3,4-tetrahydronaphthalene (**58**)

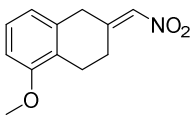

Compound **58** was synthesized according to the protocol of compound **55** using a solution 5-methoxy-2-tetralone (346 mg, 1.97 mmol) in nitromethane (5 mL), acetic acid (80.0  $\mu$ L, 1.32 mmol) and ammonium acetate (140 mg, 1.82 mmol). Purification by column chromatography on silica gel (*n*-hexane/ethyl acetate, 6:1) afforded **58** (268 mg, 69%) as yellow oil. IR: (NaCl): 2938, 3838, 1670, 1553, 1471, 1368, 1267, 1092, 910, 775, 732, 650  $\text{cm}^{-1}$ ;  $^1\text{H}$ -NMR (600 MHz,  $\text{CDCl}_3$ ):  $\delta$  7.15 (dd,  $J$  = 8.2, 7.6 Hz, 1H), 6.83–6.80 (m, 1H), 6.73 (d,  $J$  = 7.5 Hz, 1H), 6.59–6.56 (m, 1H), 5.04 (s, 2H), 3.83 (s, 3H), 2.92–2.87 (m, 2H), 2.44–2.39 (m, 2H);  $^{13}\text{C}$ -NMR (151 MHz,  $\text{CDCl}_3$ ):  $\delta$  156.2, 133.6, 131.8, 129.0, 127.0, 122.8, 119.8, 111.0, 100.0, 55.5, 24.9, 20.0; HPLC (254 nm system A):  $t_R$  = 19.8 min; ESI-MS: 173.3  $[\text{M}-\text{NO}_2]^+$ .

#### (5-Methoxy-1,2,3,4-tetrahydronaphthalen-2-yl)methanamine (**59**)<sup>20</sup>

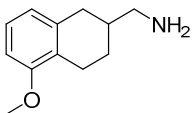

Compound **59** was synthesized according to the protocol of compound **56** using  $\text{LiAlH}_4$  (4 M in THF, 700  $\mu$ L, 2.80 mmol) in dry THF (4 mL) and a solution of compound **58** (98.2 mg, 448  $\mu$ mol) in dry THF (1 mL). The reaction time was 3 h. Purification by column chromatography on silica gel ( $\text{CH}_2\text{Cl}_2/\text{MeOH}/\text{NH}_3$  aqu. 25%, 30:2:0.03) afforded **59** (24.7 mg, 28%) as pale yellow oil. IR (NaCl): 3419, 2927, 2835, 1635, 1585, 1468, 1308, 1253, 1099, 765  $\text{cm}^{-1}$ ;  $^1\text{H}$ -NMR (600 MHz,  $\text{CDCl}_3$ ):  $\delta$  7.10–7.05 (m, 1H), 6.71 (d,  $J$  = 7.6 Hz, 1H), 6.66 (d,  $J$  = 8.1 Hz, 1H), 3.81 (s, 3H), 2.92–2.85 (m, 2H), 2.72 (d,  $J$  = 5.3 Hz, 2H), 2.53 (ddd,  $J$  = 17.6, 11.2, 6.2 Hz, 1H), 2.48–2.42 (m, 1H), 2.02 (ddt,  $J$  = 15.5, 5.6, 2.8 Hz, 1H), 1.79–1.71 (m, 1H), 1.35 (ddd,  $J$  = 24.0, 11.3, 5.7 Hz, 1H);  $^{13}\text{C}$ -NMR (91 MHz,  $\text{CDCl}_3$ ):  $\delta$  157.4, 137.7, 126.1, 125.8, 121.6, 107.1, 55.4, 47.9, 37.4, 34.0, 26.8, 22.9; HPLC (254 nm, system A):  $t_R$  = 14.3 min; ESI-MS: 192.2  $[\text{M}+\text{H}]^+$ .



**1-(5-Methoxy-1,2,3,4-tetrahydronaphthalen-2-yl)-*N,N,N*-trimethylmethanaminium formate (14)**

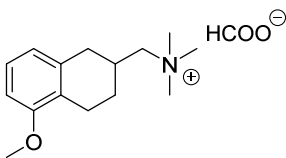

Compound **14** was synthesized according to the protocol of compound **1** using a solution of compound **59** (9.4 mg, 49.3  $\mu$ mol) in dry DMF (2 mL), methyl iodide (30.0  $\mu$ L, 483  $\mu$ mol) and  $K_2CO_3$  (27.6 mg, 200  $\mu$ mol). Purification by preparative HPLC (system 2) afforded **14** (12.5 mg, 90%) as white solid. IR (NaCl): 2989, 2900, 1735, 1394, 1255, 1057, 892  $cm^{-1}$ ;  $^1H$ -NMR (600 MHz,  $D_2O$ ):  $\delta$  8.49 (s, 1H), 7.23–7.19 (m, 1H), 6.89 (d,  $J$  = 8.2 Hz, 1H), 6.83 (d,  $J$  = 7.7 Hz, 1H), 3.84 (s, 3H), 3.43 (dd,  $J$  = 13.6, 4.6 Hz, 1H), 3.37–3.32 (m, 1H), 3.19 (s, 9H), 3.05 (dd,  $J$  = 16.2, 4.1 Hz, 1H), 2.87–2.80 (m, 1H), 2.73–2.59 (m, 2H), 2.39–2.31 (m, 1H), 2.14–2.08 (m, 1H), 1.64 (dtd,  $J$  = 13.2, 10.5, 5.8 Hz, 1H);  $^{13}C$ -NMR (151 MHz,  $D_2O$ ):  $\delta$  157.4, 137.0, 127.4, 125.2, 122.4, 109.2, 72.5, 56.2, 54.1 (t,  $J$  = 4.5 Hz), 35.7, 29.4, 28.9, 22.4 ( $HCOO^-$  was not detected); HPLC (220 nm, system A):  $t_R$  = 13.8 min, purity: > 99%, (220 nm, system B):  $t_R$  = 13.4 min, purity: 97%; HR-ESIMS: calcd 234.1852, found 234.1855  $[M]^+$ .

**8-Methoxy-*N,N*-dimethyl-1,2,3,4-tetrahydronaphthalen-2-amine (15)** <sup>16</sup>

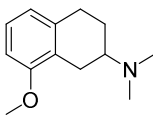

Compound **15** was prepared according to the protocol of compound **39** using a solution of 5-methoxy-2-tetralone (1.09 g, 6.17 mmol) in dry THF (20 mL), dimethylamine (2 M in THF, 11.0 mL, 22.0 mmol), acetic acid (380  $\mu$ L, 6.70 mmol) and sodium triacetoxyborohydride (3.27 g, 15.4 mmol). Reaction time was 18 h at room temperature. Purification by column chromatography on silica gel ( $CH_2Cl_2/MeOH/NH_3$  aqu. 25%, 10:1:0.01) to give **15** (1.09 g, 83%) as pale brown solid. Mp: 45–48.5  $^{\circ}C$ ; IR (NaCl): 2931, 2771, 1587, 1469, 1332, 1096, 1036, 764  $cm^{-1}$ ;  $^1H$ -NMR (600 MHz,  $CDCl_3$ ):  $\delta$  7.11–7.06 (m, 1H), 6.71 (d,  $J$  = 7.7 Hz, 1H), 6.66 (d,  $J$  = 8.1 Hz, 1H), 3.82 (s, 3H), 3.02

(dd,  $J = 16.8, 4.5$  Hz, 1H), 2.93–2.86 (m, 1H), 2.86–2.78 (m, 1H), 2.67–2.59 (m, 1H), 2.47 (dd,  $J = 16.8, 11.0$  Hz, 1H), 2.42 (s, 6H), 2.16–2.08 (m, 1H), 1.60 (qd,  $J = 12.0, 5.2$  Hz, 1H);  $^{13}\text{C}$ -NMR (151 MHz,  $\text{CDCl}_3$ ):  $\delta$  157.5, 137.5, 126.1, 124.2, 120.7, 106.9, 60.9, 55.3, 41.6, 29.4, 26.1, 25.3; HPLC (254 nm, system A):  $t_{\text{R}} = 11.8$  min, purity: 98%, (254 nm, system B):  $t_{\text{R}} = 11.5$  min, purity: 98%; ESI-MS: 206.3  $[\text{M}+\text{H}]^+$ .

### 7-(Dimethylamino)-5,6,7,8-tetrahydronaphthalen-1-ol (**16**)<sup>18</sup>

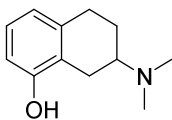

A suspension of compound **15** (295 mg, 1.44 mmol) in aqueous HBr (48%, 15 mL) was stirred under Ar-atmosphere and reflux conditions for 2 h and was then allowed to cool to room temperature. The aqueous phase was adjusted to pH 9 with saturated, aqueous  $\text{NaHCO}_3$  solution before the aqueous layer was extracted three times with ethyl acetate. The combined organic layers were washed with saturated, aqueous NaCl solution and dried ( $\text{Na}_2\text{SO}_4$ ). After evaporation, the crude residue was purified by column chromatography on silica gel ( $\text{CH}_2\text{Cl}_2/\text{MeOH}/\text{NH}_3$  aqu. 25%, 10:1:0.01) to give **16** (295 mg, 82%) as brown solid. Mp: 158–161 °C; IR (NaCl): 3197, 2944, 1584, 1465, 1337, 1275, 1083, 1036, 881, 761  $\text{cm}^{-1}$ ;  $^1\text{H}$ -NMR (360 MHz, DMSO):  $\delta$  9.16 (s, 1H), 6.92–6.81 (m, 1H), 6.57 (d,  $J = 7.8$  Hz, 1H), 6.50 (d,  $J = 7.6$  Hz, 1H), 2.87–2.59 (m, 3H), 2.48–2.40 (m, 1H), 2.32 (dd,  $J = 16.5, 10.3$  Hz, 1H), 2.25 (s, 6H), 2.03–1.88 (m, 1H), 1.44 (qd,  $J = 11.3, 5.4$  Hz, 1H);  $^{13}\text{C}$ -NMR (91 MHz, DMSO):  $\delta$  155.0, 137.2, 125.6, 122.3, 118.8, 111.4, 60.0, 41.4, 28.7, 25.4, 25.4; HPLC: (220 nm, system A):  $t_{\text{R}} = 10.4$  min, purity: 97%, (220 nm, system B):  $t_{\text{R}} = 10.7$  min, purity: 96%; ESI-MS: 192.3  $[\text{M}+\text{H}]^+$ .

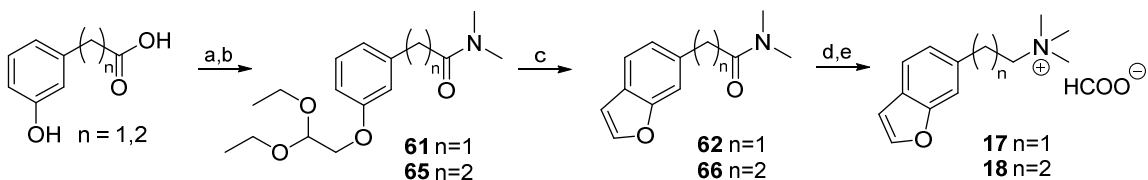

**Scheme S6.** Synthesis of compounds **17** and **18**. *Reagents and conditions:* a)  $\text{HN}(\text{CH}_3)_2$ , PyBOP, DIPEA, DMF, r.t., 18 h; b) 1. NaH, DMF, r.t., 1 h, 2. bromoacetaldehyde diethylacetal, DMF, r.t. to 40 °C, 16 h; c) 1. AcOH, 2.  $\text{BF}_3$  etherate,  $\text{CH}_2\text{Cl}_2$ , r.t., 24 h; d)  $\text{LiAlH}_4$ , THF, r.t., 1 h; e) MeI,  $\text{K}_2\text{CO}_3$ , DMF, r.t., 16 h.

For the synthesis of the bicyclic benzofurans **17** and **18** (scheme 7), 3-hydroxy phenylacetic acid and 3-hydroxy phenylpropionic acid were converted to the *N,N*-dimethylamide analogs followed by alkylation of the phenol moiety with protected bromoacetaldehyde (**61** and **65**). Under acidic conditions the acetals were cleaved and  $\text{BF}_3$  etherate catalyzed cyclization resulted in the benzofurans **62** and **66**. Reduction of the amides and methylation of the obtained tertiary amines resulted in the products **17** and **18**. For both derivatives (**62** and **66**) the cyclisation reaction led to two regioisomers. Whilst those of the propionic amide **56** could be separated by flash chromatography, the separation of the isomers of the acetamide derivative **62** was only successful using preparative HPLC.

### 2-(3-Hydroxyphenyl)-*N,N*-dimethylacetamide (**60**)<sup>21</sup>

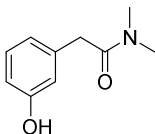

To a solution of 3-hydroxyphenyle acetic acid (498 mg, 3.29 mmol) and benzotriazol-1-yl-oxytripyrrolidinophosphonium-hexafluorophosphate (1.99 g, 3.83 mmol) in dry DMF (20 mL) was added diisopropylethylamine (1.00 mL, 5.88 mmol) and the mixture was stirred at room temperature for 10 min. Subsequently, dimethylamine (2 M in THF, 4.00 mL, 8.00 mmol) was added and the reaction was stirred at room temperature for 18 h. After evaporation, the crude residue was dissolved in ethyl acetate and the organic layer was washed twice with saturated, aqueous  $\text{NaHCO}_3$  solution, once with saturated, aqueous NaCl solution and dried ( $\text{Na}_2\text{SO}_4$ ). After evaporation, the crude residue was purified by column chromatography on silica gel ( $\text{CH}_2\text{Cl}_2/\text{MeOH}$ , 60:1) to give **60** (182 mg, 31%) as pale brown oil. IR: 3234, 2961, 1626, 1587, 1486, 1457, 1404, 1260, 1148, 845, 776, 693  $\text{cm}^{-1}$ ;  $^1\text{H}$ -NMR (360 MHz,  $\text{CDCl}_3$ ):  $\delta$  7.19–7.12 (m, 1H), 7.10 (s,

1H), 6.91–6.87 (m, 1H), 6.76–6.69 (m, 2H), 3.68 (s, 2H), 3.00 (s, 3H), 2.98 (s, 3H); <sup>13</sup>C-NMR (91 MHz, CDCl<sub>3</sub>): δ 171.6, 157.0, 136.0, 129.8, 120.6, 115.3, 114.3, 41.0, 37.9, 35.9; HPLC (254 nm, system A): t<sub>R</sub> = 14.6 min; ESI-MS: 180.2 [M+H]<sup>+</sup>.

### 2-(3-(2,2-Diethoxyethoxy)phenyl)-N,N-dimethylacetamide (61)

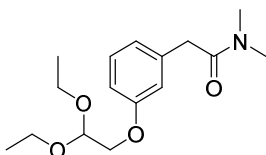

To a solution of compound **60** (221 mg, 1.24 mmol) in dry DMF (20 mL) was added NaH (60% suspension, 58.2 mg, 1.46 mmol) under Ar-atmosphere at 0 °C. The suspension was stirred at room temperature for 1 h. Subsequently, bromoacetaldehyde diethylacetal (300 μL, 1.98 μmol) was added dropwise and the reaction was stirred at 40 °C for 16 h. After cooling to room temperature, water was added and the mixture was stirred for additional 20 min. The aqueous phase was extracted three times with ethyl acetate. The combined organic layers were washed with saturated, aqueous NaCl solution and dried (Na<sub>2</sub>SO<sub>4</sub>). After evaporation, the crude residue was purified by column chromatography on silica gel (CH<sub>2</sub>Cl<sub>2</sub>/MeOH, 60:1) to give **61** (152 mg, 42%) as colorless oil. IR (NaCl): 3483, 2976, 2932, 1647, 1490, 1447, 1396, 1262, 1134, 1072, 775 cm<sup>-1</sup>; <sup>1</sup>H-NMR (600 MHz, CDCl<sub>3</sub>): δ 7.24–7.19 (m, 1H), 6.86–6.82 (m, 2H), 6.82–6.78 (m, 1H), 4.82 (t, *J* = 5.2 Hz, 1H), 3.99 (d, *J* = 5.2 Hz, 2H), 3.76 (dq, *J* = 9.4, 7.1 Hz, 2H), 3.68 (s, 2H), 3.63 (dq, *J* = 9.4, 7.0 Hz, 2H), 2.98 (s, 3H), 2.96 (s, 3H), 1.25 (t, *J* = 7.1 Hz, 6H); <sup>13</sup>C-NMR (151 MHz, CDCl<sub>3</sub>): δ 170.9, 158.9, 136.6, 129.6, 121.4, 115.2, 112.9, 100.5, 68.5, 62.6, 41.2, 37.8, 35.6, 15.3; HPLC (254 nm, system A): t<sub>R</sub> = 19.0 min; ESI-MS: 318.4 [M+H]<sup>+</sup>.

### 2-(Benzofuran-6-yl)-N,N-dimethylacetamide (62)

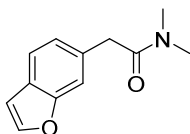

Compound **61** (150 mg, 507  $\mu$ mol) was dissolved in acetic acid (5 mL) and the solvent was subsequently evaporated. The crude residue was dissolved in  $\text{CH}_2\text{Cl}_2$  (10 mL) under Ar-atmosphere and  $\text{BF}_3$  etherate (250  $\mu$ L, 2.03 mmol) was added dropwise. The reaction mixture was stirred at room temperature for 24 h. Subsequently, an aqueous NaOH solution (1 M) was added and the aqueous phase was extracted three times with  $\text{CH}_2\text{Cl}_2$ . The combined organic layers were washed with saturated, aqueous NaCl solution and dried ( $\text{Na}_2\text{SO}_4$ ). After evaporation, the crude residue was purified by column chromatography on silica gel (*n*-hexane/ethyl acetate, 1:1) afforded **62** (16.0 mg, 15%) as pale yellow oil. Subsequently, separation of the regioisomers was carried out by preparative HPLC (eluent: 35%  $\text{CH}_3\text{CN}$  in  $\text{H}_2\text{O}$  + 0.1%  $\text{HCOOH}$ , 20 min isocratic). IR (NaCl): 3478, 2986, 2091, 1629, 1431, 1392, 1269, 1244, 1136, 1043, 762  $\text{cm}^{-1}$ ;  $^1\text{H}$ -NMR (600 MHz,  $\text{CDCl}_3$ ):  $\delta$  7.59 (d,  $J$  = 2.2 Hz, 1H), 7.53 (d,  $J$  = 8.0 Hz, 1H), 7.42 (s, 1H), 7.15 (dd,  $J$  = 8.0, 1.4 Hz, 1H), 6.74 (dd,  $J$  = 2.2, 0.9 Hz, 1H), 3.83 (s, 2H), 3.02 (s, 3H), 2.98 (s, 3H);  $^{13}\text{C}$ -NMR (151 MHz,  $\text{CDCl}_3$ ):  $\delta$  171.1, 155.3, 145.0, 131.5, 126.2, 123.7, 121.1, 111.6, 106.4, 41.1, 37.8, 35.7; HPLC (254 nm, system A):  $t_R$  = 17.6 min; ESI-MS: 204.2  $[\text{M}+\text{H}]^+$ .

### 2-(Benzofuran-6-yl)-*N,N*-dimethylethan-1-amine (**63**)

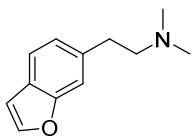

Compound **63** was synthesized according to the protocol of compound **41** using  $\text{LiAlH}_4$  (4 M in THF, 15  $\mu$ L, 60.0  $\mu$ mol) in dry THF (1 mL) and a solution of compound **62** (3.0 mg, 15.0  $\mu$ mol) in dry THF (1 mL). The reaction time was 1 h. Evaporation of the solvent afforded **63** (2.5 mg, 88%) as colorless oil. IR (NaCl): 3349, 2917, 2849, 1463, 1433, 1053, 910, 733, 647  $\text{cm}^{-1}$ ;  $^1\text{H}$ -NMR (600 MHz,  $\text{CDCl}_3$ ):  $\delta$  7.57 (d,  $J$  = 2.2 Hz, 1H), 7.50 (dd,  $J$  = 7.7, 3.7 Hz, 1H), 7.35 (s, 1H), 7.09 (dd,  $J$  = 7.9, 1.4 Hz, 1H), 6.72 (dd,  $J$  = 2.2, 0.9 Hz, 1H), 2.93–2.88 (m, 2H), 2.63–2.57 (m, 2H), 2.32 (s, 6H);  $^{13}\text{C}$ -NMR (91 MHz,  $\text{CDCl}_3$ ):  $\delta$  155.3, 144.6, 135.8, 125.5, 123.7, 120.9, 111.3, 106.4, 59.6, 45.3, 30.4; HPLC (254 nm, system A):  $t_R$  = 11.8 min; ESI-MS: 190.3  $[\text{M}+\text{H}]^+$ .

### 2-(Benzofuran-6-yl)-*N,N,N*-trimethylethan-1-aminium formate (**17**)

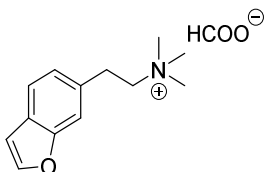

Compound **17** was synthesized according to the protocol of compound **1** using a solution of compound **63** (5.1 mg, 26.9  $\mu$ mol) in dry DMF (2 mL) and methyl iodide (20.0  $\mu$ L, 322  $\mu$ mol). Purification by preparative HPLC (system 4) afforded **17** (3.0 mg, 46%) as white solid. IR (NaCl): 3439, 2972, 2814, 1685, 1584, 1437, 1368, 1206, 1181, 1130, 802, 724  $\text{cm}^{-1}$ ;  $^1\text{H}$ -NMR (600 MHz,  $\text{D}_2\text{O}$ ):  $\delta$  8.46 (s, 1H), 7.77 (d,  $J$  = 2.2 Hz, 1H), 7.68 (d,  $J$  = 8.0 Hz, 1H), 7.54 (s, 1H), 7.24 (dd,  $J$  = 8.0, 1.4 Hz, 1H), 6.90 (dd,  $J$  = 2.2, 0.9 Hz, 1H), 3.66–3.60 (m, 2H), 3.29 (dd,  $J$  = 10.3, 6.9 Hz, 2H), 3.20 (s, 9H);  $^{13}\text{C}$ -NMR (151 MHz,  $\text{D}_2\text{O}$ ):  $\delta$  171.7, 147.3, 146.7, 129.9, 124.5, 122.4, 117.3, 112.3, 107.1, 57.0, 53.7 (t,  $J$  = 4.5 Hz), 29.6; HPLC: (220 nm, system A):  $t_{\text{R}}$  = 12.7 min, purity: > 99%, (220 nm, system B):  $t_{\text{R}}$  = 12.6 min, purity: > 99%; HR-ESIMS: calcd 204.1383, found 204.1385  $[\text{M}]^+$ .

### 3-(3-Hydroxyphenyl)-*N,N*-dimethylpropanamide (**64**)<sup>4</sup>

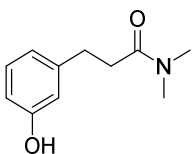

Compound **64** was synthesized according to the protocol of compound **60** using a solution of 3-hydroxyphenyle propionic acid (500 mg, 3.01 mmol) and benzotriazol-1-yl-oxytripyrrolidinophosphonium-hexafluorophosphat (1.18 g, 3.48 mmol) in dry DMF (20 mL), diisopropylamine (1.00 mL, 5.88 mmol) and a dimethylamine (2 M in THF, 4.0 mL, 8.00 mmol). Purification by column chromatography on silica gel ( $\text{CH}_2\text{Cl}_2/\text{MeOH}$ , 60:1) afforded **64** (575 mg, quant.) as colorless oil. IR (NaCl): 3242, 2938, 1623, 1489, 1456, 1404, 1261, 1157, 785, 698  $\text{cm}^{-1}$ ;  $^1\text{H}$ -NMR (600 MHz,  $\text{CDCl}_3$ ):

$\delta$  7.17–7.11 (m, 1H), 6.81–6.77 (m, 1H), 6.74 (d,  $J$  = 7.5 Hz, 1H), 6.71 (dd,  $J$  = 8.1, 2.4 Hz, 1H), 2.96 (s,  $J$  = 6.5 Hz, 3H), 2.95–2.88 (m, 5H), 2.66–2.57 (m, 2H);  $^{13}\text{C}$ -NMR (91 MHz,  $\text{CDCl}_3$ ):  $\delta$  172.7, 156.5, 142.9, 129.6, 120.1, 115.6, 113.4, 37.4, 35.7, 35.1, 31.7; HPLC (254 nm, system A):  $t_{\text{R}}$  = 16.2 min; ESI-MS: 194.3  $[\text{M}+\text{H}]^+$ .

### 3-(3-(2,2-Diethoxyethoxy)phenyl)-*N,N*-dimethylpropanamide (65)

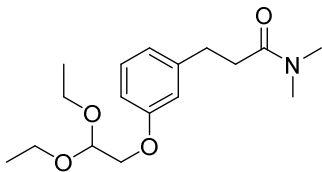

Compound **65** was synthesized according to the protocol of compound **61** using a solution of compound **64** (383 mg, 1.98 mmol) in dry DMF (20 mL), NaH (60%, 161 mg, 4.03 mmol) and bromoacetaldehyde diethylacetale (500  $\mu\text{L}$ , 3.30 mmol). The mixture was stirred at room temperature. Purification by column chromatography on silica gel ( $\text{CH}_2\text{Cl}_2/\text{MeOH}$ , 60:1) afforded **65** (188 mg, 31%) as pale yellow oil. IR (NaCl): 2975, 2931, 1648, 1488, 1448, 1398, 1264, 1135, 1073, 784, 698  $\text{cm}^{-1}$ ;  $^1\text{H}$ -NMR (600 MHz,  $\text{CDCl}_3$ ):  $\delta$  7.21–7.17 (m, 1H), 6.82 (d,  $J$  = 7.6 Hz, 1H), 6.81–6.78 (m, 1H), 6.76 (dd,  $J$  = 8.2, 2.2 Hz, 1H), 4.83 (t,  $J$  = 5.2 Hz, 1H), 3.99 (d,  $J$  = 5.2 Hz, 2H), 3.76 (dq,  $J$  = 9.3, 7.1 Hz, 2H), 3.64 (dq,  $J$  = 9.4, 7.1 Hz, 2H), 2.97–2.91 (m, 8H), 2.62–2.57 (m, 2H), 1.25 (t,  $J$  = 7.1 Hz, 6H);  $^{13}\text{C}$ -NMR (151 MHz,  $\text{CDCl}_3$ ):  $\delta$  172.1, 158.8, 143.1, 129.4, 121.1, 115.0, 112.1, 100.5, 68.5, 62.6, 37.2, 35.5, 35.2, 31.4; HPLC (254 nm, system A):  $t_{\text{R}}$  = 19.6 min; ESI-MS: 332.4  $[\text{M}+\text{Na}]^+$ .

### 3-(Benzofuran-6-yl)-*N,N*-dimethylpropanamide (66)

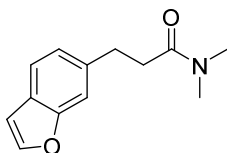

Compound **66** was synthesized according to the protocol of compound **62** first using a solution of compound **65** (100 mg, 324  $\mu\text{mol}$ ) in acetic acid (3 mL). Subsequently, the

crude residue was dissolved in CH<sub>2</sub>Cl<sub>2</sub> (5.0 mL) and BF<sub>3</sub> etherate (150 μL, 1.22 mmol) was added. Separation of the regioisomers and purification by column chromatography on silica gel (*n*-hexane/ethyl acetate, 2:1) afforded **66** (9.3 mg, 13%) as colorless oil. IR (NaCl): 2926, 1641, 1489, 1398, 1261, 1144, 1026, 814 cm<sup>-1</sup>; <sup>1</sup>H-NMR (600 MHz, CDCl<sub>3</sub>): δ 7.57 (d, *J* = 2.2 Hz, 1H), 7.50 (d, *J* = 7.9 Hz, 1H), 7.37 (s, 1H), 7.12 (dd, *J* = 7.9, 1.2 Hz, 1H), 6.72 (dd, *J* = 2.1, 0.9 Hz, 1H), 3.11–3.06 (m, 2H), 2.96 (s, 3H), 2.93 (s, 3H), 2.70–2.64 (m, 2H); <sup>13</sup>C-NMR (91 MHz, CDCl<sub>3</sub>): δ 172.3, 155.5, 144.8, 138.3, 125.7, 123.7, 121.1, 111.2, 106.5, 37.3, 35.8, 35.6, 31.7; HPLC (254 nm, system A): *t*<sub>R</sub> = 18.8 min; ESI-MS: 218.2 [M+H]<sup>+</sup>.

### 3-(Benzofuran-6-yl)-*N,N*-dimethylpropan-1-amine (**67**)

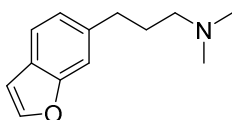

Compound **67** was synthesized according to the protocol of compound **63** using a LiAlH<sub>4</sub> (4 M in THF, 60.0 μL, 120.0 μmol) in dry THF (1 mL) and a solution of compound **66** (6.0 mg, 27.6 μmol) in dry THF (1 mL). The reaction time was 1 h. Evaporation of the solvent afforded **67** (3.3 mg, 54%) as colorless oil. IR (NaCl): 3434, 2155, 2062, 1652, 1635, 1146, 1092 cm<sup>-1</sup>; <sup>1</sup>H-NMR (600 MHz, CDCl<sub>3</sub>): δ 7.60 (d, *J* = 2.2 Hz, 1H), 7.53 (d, *J* = 7.9 Hz, 1H), 7.32 (s, 1H), 7.07 (dd, *J* = 7.9, 1.4 Hz, 1H), 6.74 (dd, *J* = 2.2, 0.9 Hz, 1H), 2.99–2.93 (m, 2H), 2.86 (t, *J* = 7.2 Hz, 2H), 2.76 (s, 6H), 2.28–2.21 (m, 2H); <sup>13</sup>C-NMR (151 MHz, CDCl<sub>3</sub>): δ 155.3, 145.1, 135.8, 126.1, 123.2, 121.4, 111.0, 106.4, 57.4, 43.0, 32.8, 26.0; HPLC (254 nm, system A): *t*<sub>R</sub> = 14.2 min; ESI-MS: 204.2 [M+H]<sup>+</sup>.

### 3-(Benzofuran-6-yl)-*N,N,N*-trimethylpropan-1-aminium formate (**18**)

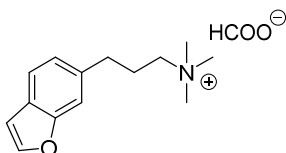



Compound **18** was synthesized according to the protocol of compound **1** using a solution of compound **67** (1.5 mg, 7.39  $\mu\text{mol}$ ) in dry DMF (2 mL) and methyl iodide (10.0  $\mu\text{L}$ , 161  $\mu\text{mol}$ ). Purification by preparative HPLC (system 2) afforded **18** (2.0 mg, quant.) as white solid. IR (NaCl): 2937, 2809, 1685, 1584, 1560, 1369, 1205, 1181, 1131  $\text{cm}^{-1}$ ;  $^1\text{H}$ -NMR (600 MHz,  $\text{D}_2\text{O}$ ):  $\delta$  7.75 (d,  $J = 2.2$  Hz, 1H), 7.65 (d,  $J = 7.9$  Hz, 1H), 7.49 (s, 1H), 7.22 (d,  $J = 7.9$  Hz, 1H), 6.89 (d,  $J = 1.3$  Hz, 1H), 3.35–3.27 (m, 2H), 3.07 (s, 9H), 2.86 (t,  $J = 7.2$  Hz, 2H), 2.20–2.15 (m, 2H) ( $\text{HCOO}^-$  was not detected);  $^{13}\text{C}$ -NMR (151 MHz,  $\text{D}_2\text{O}$ ):  $\delta$  151.0, 146.3, 137.5, 124.2, 122.1, 121.9, 111.7, 107.1, 66.6, 53.5, 32.2, 24.9 ( $\text{HCOO}^-$  was not detected); HPLC (254 nm, system A):  $t_{\text{R}} = 14.1$  min, purity: 96%, (254 nm, system B):  $t_{\text{R}} = 13.2$  min, purity: 97%; HR-ESIMS: calcd 218.1539, found 218.1539  $[\text{M}]^+$ .

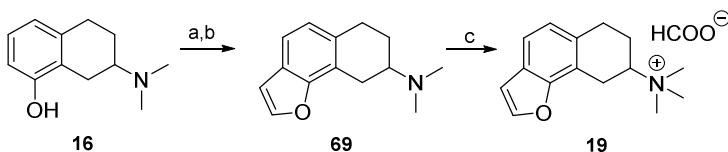

**Scheme S7.** Synthesis of compound **19**. *Reagents and conditions:* a) 1. NaH, DMF, r.t., 1 h, 2. bromoacetaldehyde diethylacetal, DMF, 70  $^{\circ}\text{C}$ , 4 h; b) 1. AcOH, 2.  $\text{BF}_3$  etherate,  $\text{CH}_2\text{Cl}_2$ , r.t., 24 h; c) MeI,  $\text{CHCl}_3$ , r.t., 16 h.

For the synthesis <sup>22</sup> of the tricyclic benzofuran **19** (scheme 8), compound **16** was alkylated with protected bromoacetaldehyde and cyclized analog to compounds **17** and **18**. Finally, the quaternary ammonium salt **10** was obtained by methylation of the tertiary amine **69**.

#### 8-(2,2-Diethoxyethoxy)-*N,N*-dimethyl-1,2,3,4-tetrahydronaphthalen-2-amine (**68**)

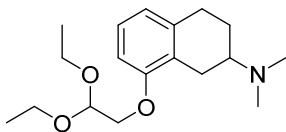

Compound **68** was synthesized according to the protocol of compound **61** using a solution of compound **16** (70.0 mg, 366  $\mu\text{mol}$  l) in dry DMF (4 mL), NaH (60%,

41.2 mg, 1.70 mmol) and bromoacetaldehyde diethylacetale (80.0  $\mu$ L, 532  $\mu$ mol). The mixture was stirred at 70  $^{\circ}$ C for 4 h. Purification by column chromatography on silica gel ( $\text{CH}_2\text{Cl}_2/\text{MeOH}$ , 10:1) afforded **68** (76.6 mg, 69%) as pale brown semi solid substance. IR (NaCl): 2975, 2931, 2771, 1587, 1456, 1374, 1346, 1257, 1135, 1101, 1077, 763  $\text{cm}^{-1}$ ;  $^1\text{H}$ -NMR (600 MHz,  $\text{CDCl}_3$ ):  $\delta$  7.08–7.03 (m, 1H), 6.72 (d,  $J$  = 7.6 Hz, 1H), 6.64 (d,  $J$  = 8.1 Hz, 1H), 4.85 (t,  $J$  = 5.2 Hz, 1H), 4.03–3.96 (m, 2H), 3.82–3.75 (m, 2H), 3.70–3.62 (m, 2H), 3.07–3.02 (m, 1H), 2.89 (ddd,  $J$  = 8.1, 5.1, 3.4 Hz, 1H), 2.81 (ddd,  $J$  = 16.8, 12.1, 5.0 Hz, 1H), 2.64–2.56 (m, 1H), 2.53–2.45 (m, 1H), 2.40 (s, 6H), 2.14–2.08 (m, 1H), 1.58 (qd,  $J$  = 12.0, 5.1 Hz, 1H), 1.25 (t,  $J$  = 7.1 Hz, 6H);  $^{13}\text{C}$ -NMR (91 MHz,  $\text{CDCl}_3$ ):  $\delta$  156.5, 137.7, 126.1, 124.7, 121.1, 108.1, 100.9, 69.0, 62.9, 62.9, 60.9, 41.7, 29.4, 25.9, 25.7, 15.4, 15.4; HPLC (220 nm, system A):  $t_R$  = 15.3 min; ESI-MS: 308.5  $[\text{M}+\text{H}]^+$ .

***N,N*-Dimethyl-6,7,8,9-tetrahydronaphtho[1,2-*b*]furan-8-amine (69)**

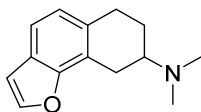

Compound **69** was synthesized according to the protocol of compound **62** first using a solution of compound **68** (60.0 mg, 195  $\mu$ mol) in acetic acid (2 mL). Subsequently, the crude residue was dissolved in  $\text{CH}_2\text{Cl}_2$  (4.0 mL) and  $\text{BF}_3$  etherate (100  $\mu$ L, 810  $\mu$ mol) was added. Purification by column chromatography on silica gel ( $\text{CH}_2\text{Cl}_2/\text{MeOH}/\text{NH}_3$  aqu. 25%, 10:1:0.01) afforded **69** (15.4 mg, 36%) as pale brown oil. IR (NaCl): 2928, 2772, 1494, 1456, 1321, 1263, 1151, 1129, 1026, 878, 815, 798, 734  $\text{cm}^{-1}$ ;  $^1\text{H}$ -NMR (360 MHz,  $\text{CDCl}_3$ ):  $\delta$  7.50 (d,  $J$  = 2.2 Hz, 1H), 7.27 (d,  $J$  = 7.9 Hz, 1H), 6.91 (d,  $J$  = 7.9 Hz, 1H), 6.64 (d,  $J$  = 2.2 Hz, 1H), 3.30–3.20 (m, 1H), 3.02–2.85 (m, 2H), 2.85–2.73 (m, 1H), 2.67 (tdd,  $J$  = 10.8, 4.7, 2.6 Hz, 1H), 2.39 (s, 6H), 2.19–2.07 (m, 1H), 1.64 (qd,  $J$  = 11.4, 5.5 Hz, 1H);  $^{13}\text{C}$ -NMR (91 MHz,  $\text{CDCl}_3$ ):  $\delta$  152.8, 143.1, 131.5, 123.4, 122.5, 118.6, 117.3, 105.7, 59.5, 40.7, 28.1, 25.6, 24.1; HPLC (254 nm, system A):  $t_R$  = 14.2 min; APCI-MS: 216.2  $[\text{M}+\text{H}]^+$ .

***N,N,N*-Trimethyl-6,7,8,9-tetrahydronaphtho[1,2-*b*]furan-8-aminium formate (**19**)**

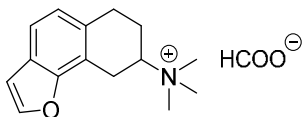

Compound **19** was synthesized according to the protocol of compound **1** using a solution of compound **69** (7.0 mg, 33.0  $\mu$ mol) in dry  $\text{CHCl}_3$  (2 mL) and methyl iodide (10.0  $\mu$ L, 161  $\mu$ mol). Purification by preparative HPLC (system 3) afforded **19** (7.0 mg, 77%) as white solid. IR (NaCl): 2989, 1590, 1490, 1394, 1049, 879, 669  $\text{cm}^{-1}$ ;  $^1\text{H}$ -NMR (600 MHz,  $\text{D}_2\text{O}$ ):  $\delta$  7.77 (d,  $J$  = 2.1 Hz, 1H), 7.53 (d,  $J$  = 8.2 Hz, 1H), 7.12 (d,  $J$  = 8.1 Hz, 1H), 6.90 (d,  $J$  = 2.1 Hz, 1H), 3.87–3.80 (m, 1H), 3.66 (ddd,  $J$  = 15.4, 5.5, 2.3 Hz, 1H), 3.23 (s, 9H) 3.22–3.16 (m, 2H), 3.08–3.01 (m, 1H), 2.57–2.52 (m, 1H), 1.95 (qd,  $J$  = 12.4, 5.1 Hz, 1H) ( $\text{HCOO}^-$  was not detected);  $^{13}\text{C}$ -NMR (151 MHz,  $\text{D}_2\text{O}$ ):  $\delta$  187.1, 153.6, 146.0, 131.9, 125.5, 123.9, 120.2, 117.0, 107.4, 71.8, 51.5 (t,  $J$  = 3.0 Hz), 28.8, 24.0, 23.8; HPLC (254 nm, system A):  $t_{\text{R}}$  = 13.9 min, purity: 98%, (254 nm, system B):  $t_{\text{R}}$  = 13.2 min, purity: 98%; HR-ESIMS: calcd 230.1539, found 230.1543  $[\text{M}]^+$ .

***N*-(3-Methoxyphenethyl)formamide (**70**)<sup>23</sup>**

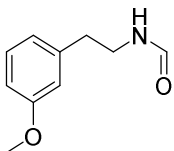

A solution of 2-(3-methoxyphenyl)ethylamine (63.2 mg, 418  $\mu$ mol) in formic acid (1 mL) was stirred under reflux conditions for 24 h. After cooling to room temperature, water was added and the aqueous layer was extracted three times with ethyl acetate. The combined organic layers were washed with saturated, aqueous NaCl solution and dried ( $\text{Na}_2\text{SO}_4$ ). Evaporation afforded **70** (17.1 mg, 23%) as colorless oil. IR (NaCl): 3286, 3051, 2940, 1665, 1602, 1585, 1489, 1456, 1260, 1153, 1039, 783  $\text{cm}^{-1}$ ;  $^1\text{H}$ -NMR (600 MHz,  $\text{CDCl}_3$ ):  $\delta$  8.14 (s, 1H), 7.26–7.21 (m, 1H), 6.80–6.77 (m, 2H), 6.76–6.73 (m, 1H), 5.50 (s, 1H), 3.80 (d,  $J$  = 1.6 Hz, 3H), 3.63–3.54 (m, 2H), 2.86–2.81 (m, 2H);  $^{13}\text{C}$ -NMR (151 MHz,  $\text{CDCl}_3$ ):  $\delta$  161.2, 160.1, 140.2, 129.9, 121.2, 114.7, 112.1, 55.4, 39.2, 35.7; HPLC (254 nm, system A):  $t_{\text{R}}$  = 16.3 min; ESI-MS: 180.4  $[\text{M}+\text{H}]^+$ .

### 2-(3-Methoxyphenyl)-*N*-methylethan-1-amine (**20**)<sup>24</sup>

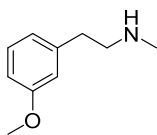

Compound **20** was synthesized according to the protocol of compound **41** using LiAlH<sub>4</sub> (4 M in THF, 60.0 μL, 240 μmol) in dry THF (2 mL) and a solution of compound **70** (10.0 mg, 55.8 μmol) in dry THF (1 mL). The reaction time was 1 h. After evaporation, purification by preparative HPLC (system 4) afforded **20** (4.1 mg, 35%) as white solid (formate salt). IR (NaCl): 2924, 2853, 1597, 1356, 1210, 1052, 974, 802, 772 cm<sup>-1</sup>; <sup>1</sup>H-NMR (600 MHz, D<sub>2</sub>O): δ 8.46 (s, 1H), 7.39–7.34 (m, 1H), 6.98–6.91 (m, 3H), 3.84 (s, 3H), 3.34–3.29 (m, 2H), 3.04–2.98 (m, 2H), 2.70 (s, 3H); <sup>13</sup>C-NMR (151 MHz, D<sub>2</sub>O): δ 171.6, 164.3, 131.0, 122.2, 115.2, 103.5, 56.0, 50.6, 33.5, 32.3 (HCOO<sup>-</sup> was not detected); HPLC (220 nm, system A): t<sub>R</sub> = 8.9 min, purity > 99%, (220 nm, system B): t<sub>R</sub> = 11.2 min, purity > 99%; ESI-MS: 166.3 [M+H]<sup>+</sup>.

### 2-(3-Hydroxyphenyl)-*N,N,N*-trimethylethan-1-aminium formate (**21**)<sup>2</sup>

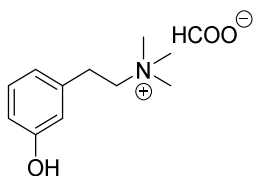

Compound **21** was synthesized according to the protocol of compound **16** using a solution of compound **3** (18.4 mg, 76.9 μmol) in aqueous HBr (48%, 2 mL). After evaporation of the solvent by lyophilisation, purification of the crude residue by preparative HPLC (system 5) afforded **21** (8.3 mg, 48%) as white solid. IR (NaCl): 3167, 2925, 1613, 1588, 1483, 1353, 1281, 1160, 772, 699 cm<sup>-1</sup>; <sup>1</sup>H-NMR (600 MHz, D<sub>2</sub>O): δ 7.31–7.27 (m, 1H), 6.91 (d, *J* = 7.7 Hz, 1H), 6.86–6.82 (m, 2H), 3.59–3.53 (m, 2H), 3.18 (s, 9H), 3.13–3.08 (m, 2H); <sup>13</sup>C-NMR (151 MHz, D<sub>2</sub>O): δ 182.4, 156.5, 138.3, 131.1, 121.6, 116.4, 114.9, 67.6, 53.7 (t, *J* = 4.5 Hz), 29.4; HPLC (220 nm, system A): t<sub>R</sub> =

4.9 min, purity: > 99%, (220 nm, system B):  $t_R$  = 5.9 min, purity: 99%; HR-ESIMS: calcd 180.13829, found 180.13840  $[M]^+$ .

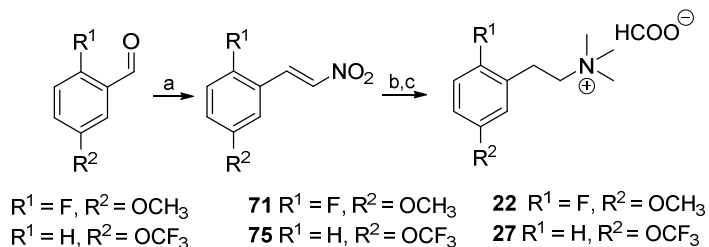

**Scheme S8.** Synthesis of the target compounds **22** and **27**. *Reagents and conditions:* a) AcOH,  $NH_4OAc$ ,  $CH_3NO_2$ , reflux, 1.5 - 3 h; b)  $LiAlH_4$ , THF, r.t., 4 - 5 h; c) MeI,  $K_2CO_3$ ,  $CHCl_3$ , r.t., 16 h.

A fluoro substituent in para position to the methoxy group (**22**) as well as a trifluoromethoxy substituent at the aromatic moiety (**27**) could be incorporated starting with the corresponding benzaldehydes. A Henry reaction gave the nitroolefines **71**<sup>25</sup> and **75**<sup>26</sup>, which were treated with  $LiAlH_4$  to give the primary amines. Methylation of these amines resulted in the quaternary ammonium derivatives **22** and **27**.

#### 1-Fluoro-4-methoxy-2-(2-nitrovinyl)benzene (**71**)<sup>25</sup>

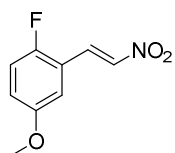

Compound **71** was synthesized according to the protocol of compound **55** using a solution of 2-fluoro-5-methoxybenzaldehyde (800 mg, 3.19 mmol), acetic acid (320  $\mu$ L, 5.33 mmol) and ammonium acetate (506 mg, 6.56 mmol) in nitromethane (10 mL). The reaction time was 1.5 h. Purification by column chromatography on silica gel (*n*-hexane/ethyl acetate, 9:1) gave **71** (266 mg, 26%) as yellow solid. Mp: 81.7–86 °C; IR (NaCl): 3139, 1631, 1590, 1502, 1348, 1285, 1225, 1040, 970, 845, 762, 715  $cm^{-1}$ ;  $^1H$ -NMR (360 MHz,  $CDCl_3$ ):  $\delta$  8.01 (d,  $J$  = 13.8 Hz, 1H), 7.70 (d,  $J$  = 13.8 Hz, 1H), 7.14–7.06 (m, 1H), 7.03–6.98 (m, 1H), 6.98–6.91 (m, 1H), 3.83 (s, 3H);  $^{13}C$ -NMR (91 MHz,  $CDCl_3$ ):  $\delta$  156.5 (d,  $J$  = 249 Hz), 156.2 (d,  $J$  = 2.3 Hz), 139.7 (d,  $J$  = 11.4 Hz), 132.7 (d,  $J$

= 0.9 Hz), 119.4 (d,  $J$  = 8.9 Hz), 118.8 (d,  $J$  = 13.9 Hz), 117.4 (d,  $J$  = 24.0 Hz), 115.0 (d,  $J$  = 2.7 Hz), 56.1; HPLC (254 nm, system A):  $t_R$  = 24.1 min; ESI-MS: 152.3 [(M+H)-NO<sub>2</sub>]<sup>+</sup>.

## 2-(2-Fluoro-5-methoxyphenyl)ethan-1-amine (**72**)<sup>25</sup>

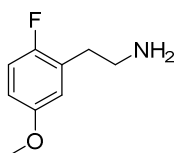

Compound **72** was synthesized according to the protocol of compound **56** using LiAlH<sub>4</sub> (1 M in THF, 3.00 mL, 3.00 mmol) in dry THF (10 mL) and a solution of compound **71** (104 mg, 528 μmol) in dry THF (2 mL). The reaction time was 5 h. Purification by column chromatography on silica gel (CH<sub>2</sub>Cl<sub>2</sub>/MeOH/NH<sub>3</sub> aqu. 25%, 30:1:0.03) afforded **72** (45.4 mg, 50%) as pale, yellow oil. IR (NaCl): 3364, 3292, 2939, 1594, 1500, 1279, 1209, 1152, 1038, 810, 726 cm<sup>-1</sup>; <sup>1</sup>H-NMR (600 MHz, CDCl<sub>3</sub>): δ 6.98–6.93 (m, 1H), 6.74 (dd,  $J$  = 5.9, 3.1 Hz, 1H), 6.73–6.68 (m, 1H), 3.78 (s, 3H), 3.71–3.68 (m, 1H), 3.12–2.94 (m, 2H), 2.79 (t,  $J$  = 6.3 Hz, 2H), 1.72–1.66 (m, 1H); <sup>13</sup>C-NMR (151 MHz, CDCl<sub>3</sub>): δ 155.8 (d,  $J$  = 237 Hz), 155.7 (d,  $J$  = 1.5 Hz), 127.0 (d,  $J$  = 18.2 Hz), 116.3 (d,  $J$  = 4.9 Hz), 115.8 (d,  $J$  = 24.0 Hz), 112.7 (d,  $J$  = 8.2 Hz), 55.8, 42.0, 33.0; HPLC (254 nm, system A):  $t_R$  = 5.1 min; ESI-MS: 170.3 [M+H]<sup>+</sup>.

## 2-(2-Fluoro-5-methoxyphenyl)-*N,N,N*-trimethylethan-1-aminium formate (**22**)

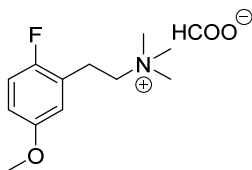

Compound **22** was synthesized according to the protocol of compound **1** using a solution of compound **72** (10.0 mg, 59.1 μmol) in dry CHCl<sub>3</sub> (2 mL), methyl iodide (20.0 μL, 322 μmol) and K<sub>2</sub>CO<sub>3</sub> (26.1 mg, 191 μmol). Purification by preparative HPLC (system 1) afforded **22** (8.4 mg, 67%) as white solid. IR (NaCl): 3413, 2957, 2815, 1689, 1613,

1505, 1352, 1213, 1121, 1043, 819, 718  $\text{cm}^{-1}$ ;  $^1\text{H}$ -NMR (600 MHz,  $\text{D}_2\text{O}$ ):  $\delta$  8.50 (s, 1H), 7.19–7.12 (m, 1H), 6.98–6.93 (m, 2H), 3.84 (s, 3H), 3.61–3.56 (m, 2H), 3.27–3.17 (m, 11H);  $^{13}\text{C}$ -NMR (91 MHz,  $\text{D}_2\text{O}$ ):  $\delta$  155.8 (d,  $J = 2.3$  Hz), 154.4 (d,  $J = 243$  Hz), 127.1 (d,  $J = 17.8$  Hz), 117.0 (d,  $J = 20.0$  Hz), 116.9 (d,  $J = 2.6$  Hz), 115.0 (d,  $J = 9.0$  Hz), 66.1, 56.6, 53.6 (t,  $J = 4.1$  Hz), 23.6 ( $\text{HCOO}^-$  was not detected); HPLC (220 nm, system A):  $t_{\text{R}} = 12.2$  min, purity: > 99%, (220 nm, system B):  $t_{\text{R}} = 12.1$  min, purity: > 99%; HR-ESIMS: calcd 212.14452, found 212.14480  $[\text{M}]^+$ .

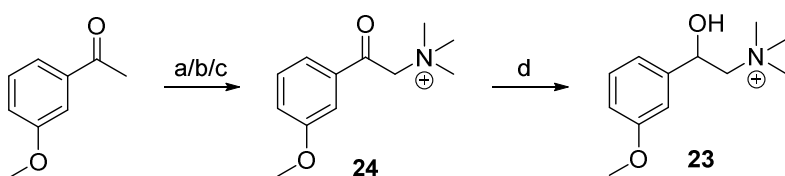

**Scheme S9.** Synthesis of the target compounds **23** and **24**. *Reagents and conditions:* a)  $\text{Br}_2$ ,  $\text{CHCl}_3$ , r.t., 24 h; b)  $\text{HN}(\text{CH}_3)_2$ ,  $\text{CHCl}_3$ , r.t., 8 h; c)  $\text{MeI}$ ,  $\text{DMF}$ , r.t., 16 h; d)  $\text{PS-BH}_3$ ,  $\text{THF/MeOH}$ , r.t., 6 h.

Bromination of 3-methoxy acetophenone, followed by a nucleophilic substitution with *N,N*-dimethylamine and methylation of the tertiary amine resulted in the ketone **24**. Reduction of the carbonyl group with polymer supported  $\text{BH}_3$  gave the desired benzylic alcohol **23**.

### 2-Bromo-1-(3-methoxyphenyl)ethan-1-one (**73**)<sup>27</sup>

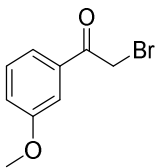

To a solution of 3-methoxy acetophenone (120 mg, 800  $\mu\text{mol}$ ) in  $\text{CHCl}_3$  (4 mL) was added  $\text{Br}_2$  (15.0  $\mu\text{L}$ , 293  $\mu\text{mol}$ ) dropwise. The reaction was stirred at room temperature for 24 h and additional  $\text{Br}_2$  (15.0  $\mu\text{L}$ , 293  $\mu\text{mol}$  each time) was added after 2 h, 5 h and 11 h. Subsequently, saturated, aqueous  $\text{Na}_2\text{S}_2\text{O}_3$  solution was added and the mixture was

stirred for 15 min. CH<sub>2</sub>Cl<sub>2</sub> was added and the aqueous phase was extracted three times with CH<sub>2</sub>Cl<sub>2</sub>. The combined organic layers were washed with saturated, aqueous NaCl solution and dried (Na<sub>2</sub>SO<sub>4</sub>). After evaporation, the crude residue was purified by column chromatography on silica gel (CH<sub>2</sub>Cl<sub>2</sub>/*n*-hexane, 2:1) to give **73** (181 mg, quant.) as white solid. Mp: 62–64 °C; IR (NaCl): 2943, 1683, 1597, 1488, 1433, 1281, 1163, 1023, 861, 788, 682 cm<sup>-1</sup>; <sup>1</sup>H-NMR (600 MHz, CDCl<sub>3</sub>): δ 7.56 (ddd, *J* = 7.7, 1.5, 0.9 Hz, 1H), 7.51 (dd, *J* = 2.5, 1.7 Hz, 1H), 7.42–7.38 (m, 1H), 7.16 (ddd, *J* = 8.3, 2.7, 0.9 Hz, 1H), 4.45 (s, 2H), 3.87 (s, 3H); <sup>13</sup>C-NMR (91 MHz, CDCl<sub>3</sub>): δ 191.1, 160.0, 135.3, 129.8, 121.5, 120.5, 113.2, 55.5, 30.9; HPLC (254 nm, system A): *t*<sub>R</sub> = 16.0 min; ESI-MS: 231.2 [M+H]<sup>+</sup>.

### 2-(Dimethylamino)-1-(3-methoxyphenyl)ethan-1-one (**74**)<sup>28</sup>

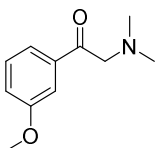

To a solution of compound **73** (102 mg, 445 μmol) in dry CHCl<sub>3</sub> (5 mL) was added dimethylamine (2 M in THF, 2.20 mL, 4.40 mmol) dropwise. The reaction was stirred at room temperature for 8 h. After evaporation, the crude residue was purified by column chromatography on silica gel (CH<sub>2</sub>Cl<sub>2</sub>/MeOH/NH<sub>3</sub> aqu. 25%, 1:1:0.015) to give **64** (37.8 mg, 43%) as orange oil. IR (NaCl): 2941, 2836, 1676, 1584, 1466, 1263, 1043, 763 cm<sup>-1</sup>; <sup>1</sup>H-NMR (360 MHz, CDCl<sub>3</sub>): δ 7.58–7.54 (m, 1H), 7.52 (dd, *J* = 2.5, 1.6 Hz, 1H), 7.39–7.33 (m, 1H), 7.11 (ddd, *J* = 8.2, 2.7, 0.9 Hz, 1H), 3.85 (s, 3H), 3.83 (s, 2H), 2.44 (s, 6H); <sup>13</sup>C-NMR (91 MHz, CDCl<sub>3</sub>): δ 171.0, 159.7, 133.6, 129.3, 122.4, 119.2, 114.3, 55.6, 45.1, 34.9; HPLC (254 nm, system A): *t*<sub>R</sub> = 10.7 min; ESI-MS: 194.4 [M+H]<sup>+</sup>.

### 2-Hydroxy-2-(3-methoxyphenyl)-*N,N,N*-trimethylethan-1-aminium formate (**23**)

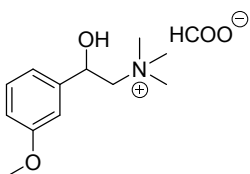



A suspension of BH<sub>3</sub> resin (20-50 mesh, 2.0 mmol/g, 200 mg, 400 μmol) in dry THF (2 mL) and dry MeOH (2 mL) was stirred under Ar-atmosphere at room temperature for 30 min. Subsequently, a solution of compound **24** (25.0 mg, 98.8 μmol) in dry MeOH (1 mL) was added dropwise and the reaction was stirred at room temperature for 6 h. The resin was filtered off. After evaporation, the crude residue was purified by preparative HPLC (system 6) to give **23** (20.4 mg, 80%) as colorless semi solid substance. IR (NaCl): 3365, 3220, 2917, 2844, 1652, 1601, 1488, 1436, 1325, 1281, 1035, 961, 777, 699 cm<sup>-1</sup>; <sup>1</sup>H-NMR (600 MHz, DMSO): δ 8.83 (s, 1H), 7.34–7.27 (m, 1H), 7.04–6.97 (m, 2H), 6.88 (d, *J* = 7.5 Hz, 1H), 5.22 (d, *J* = 9.2 Hz, 1H), 3.77 (s, 3H), 3.61–3.47 (m, 1H), 3.47–3.38 (m, 1H), 3.22 (s, 9H); <sup>13</sup>C-NMR (151 MHz, DMSO): δ 172.7, 159.3, 143.4, 129.6, 118.2, 113.3, 111.9, 67.5, 60.7, 55.1, 53.5; HPLC (220 nm, system A): *t*<sub>R</sub> = 8.5 min, purity: 95%, (220 nm, system B): *t*<sub>R</sub> = 10.2 min, purity: > 99%; HR-ESIMS: calcd 210.14886, found 210.14890 [M]<sup>+</sup>.

#### 2-(3-Methoxyphenyl)-*N,N,N*-trimethyl-2-oxoethan-1-aminium formate (**24**)

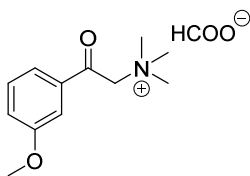

Compound **24** was synthesized according to the protocol of compound **1** using a solution of compound **74** (125 mg, 648 μmol) in dry DMF (2 mL) and methyl iodide (70.0 μL, 1.13 mmol). Purification by preparative HPLC (system 4) afforded **24** (45.5 mg, 28%) as white solid. IR (NaCl): 3464, 2917, 1696, 1581, 1457, 1431, 1268, 1043, 920, 859, 771, 682 cm<sup>-1</sup>; <sup>1</sup>H-NMR (600 MHz, DMSO): δ 8.58 (s, 1H), 7.58 (d, *J* = 7.5 Hz, 1H), 7.56–7.51 (m, 1H), 7.49 (s, 1H), 7.33 (dd, *J* = 8.0, 1.8 Hz, 1H), 5.37 (s, 2H), 3.85 (s, 3H), 3.32 (s, 9H); <sup>13</sup>C-NMR (91 MHz, DMSO): δ 191.1, 167.0, 159.4, 135.6, 130.2, 120.5, 120.3, 112.6, 67.2, 55.5, 53.4; HPLC (220 nm, system A): *t*<sub>R</sub> = 11.7 min, purity: > 99%; (220 nm, system B): *t*<sub>R</sub> = 11.7 min; purity: > 99%; HR-ESIMS: calcd 208.1332, found 208.1331 [M]<sup>+</sup>.

### 2-(3-Ethoxyphenyl)-*N,N,N*-trimethylethan-1-aminium formate (**25**)<sup>3</sup>

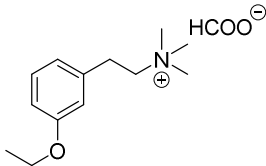

Compound **25** was synthesized according to the protocol of compound **1** using a solution of compound **21** (4.1 mg, 18.2  $\mu\text{mol}$ ) in dry DMF (2 mL), ethyliodide (20.0  $\mu\text{L}$ , 250  $\mu\text{mol}$ ) and  $\text{K}_2\text{CO}_3$  (7.6 mg, 55.5  $\mu\text{mol}$ ). After stirring at room temperature for 16 h, additional ethyliodide (10.0  $\mu\text{L}$ , 125  $\mu\text{mol}$ ) and  $\text{K}_2\text{CO}_3$  (10.0 mg, 73.0  $\mu\text{mol}$ ) were added and the reaction was stirred at room temperature for additional 24 h. Purification by preparative HPLC (system 4) afforded **25** (3.2 mg, 69%) as white solid. IR (NaCl): 3446, 2934, 1599, 1475, 1394, 1257, 1172, 1047, 944, 766, 698  $\text{cm}^{-1}$ ;  $^1\text{H}$ -NMR (600 MHz,  $\text{D}_2\text{O}$ ):  $\delta$  8.45 (bs, 1H), 7.39–7.33 (m, 1H), 6.98 (d,  $J = 7.5$  Hz, 1H), 6.96–6.93 (m, 2H), 4.13 (q,  $J = 7.0$  Hz, 2H), 3.62–3.53 (m, 2H), 3.18 (s, 9H), 3.17–3.12 (m, 2H), 1.37 (t,  $J = 7.0$  Hz, 3H);  $^{13}\text{C}$ -NMR (151 MHz,  $\text{D}_2\text{O}$ ):  $\delta$  180.2, 159.1, 138.2, 131.0, 122.4, 116.0, 114.2, 67.6, 65.1, 53.7 (t,  $J = 4.5$  Hz), 29.5, 14.6; HPLC (220 nm, system A):  $t_{\text{R}} = 12.6$  min, purity: 98%, (220 nm, system B):  $t_{\text{R}} = 12.4$  min, purity: 98%, HR-ESIMS: calcd 208.16959, found 208.16975  $[\text{M}]^+$ .

### 2-(3-Chlorophenyl)-*N,N,N*-trimethylethan-1-aminium formate (**26**)<sup>29</sup>

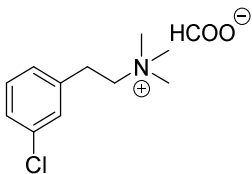

Compound **26** was synthesized according to the protocol of compound **1** using a solution of 2-(3-chlorophenyl)ethylamine (20.0  $\mu\text{L}$ , 144  $\mu\text{mol}$ ) in dry DMF (2 mL), methyl iodide (80.0  $\mu\text{L}$ , 1.28 mmol) and  $\text{K}_2\text{CO}_3$  (56.5 mg, 412  $\mu\text{mol}$ ). Purification by preparative HPLC (system 1) afforded **26** (24.6 mg, 72%) as white semi solid substance. IR (NaCl): 3392, 3015 2829, 1597, 1480, 1256, 1081, 973, 921, 772, 695  $\text{cm}^{-1}$ ;  $^1\text{H}$ -NMR (600 MHz,  $\text{D}_2\text{O}$ ):  $\delta$  8.59 (s, 1H), 7.40–7.34 (m, 3H), 7.28–7.24 (m,  $J = 6.4, 2.0$  Hz, 1H), 3.60–3.53

(m, 2H), 3.19 (s, 9H), 3.18–3.11 (m, 2H);  $^{13}\text{C}$ -NMR (91 MHz,  $\text{D}_2\text{O}$ ):  $\delta$  138.3, 134.5, 131.0, 129.3, 127.9, 127.8, 67.2 (t,  $J = 2.7$  Hz), 53.6 (t,  $J = 3.6$  Hz), 29.0 ( $\text{HCOO}^-$  was not detected); HPLC (220 nm, system A):  $t_{\text{R}} = 11.1$  min, purity: 99%, (220 nm, system B):  $t_{\text{R}} = 12.4$  min, purity > 99%; HR-ESIMS: calcd 198.10440, found 198.10496  $[\text{M}]^+$ .

### 1-(2-Nitrovinyl)-3-(trifluoromethoxy)benzene (**75**)<sup>26</sup>

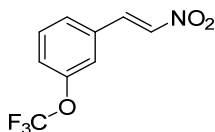

Compound **75** was synthesized according to the protocol of compound **55** using a solution of 3-(trifluoromethoxy)-benzaldehyde (80.0 mg, 560  $\mu\text{mol}$ ), acetic acid (40.0  $\mu\text{L}$ , 700  $\mu\text{mol}$ ) and ammonium acetate (50.7 mg, 658  $\mu\text{mol}$ ) in nitromethane (3 mL). The reaction time was 3 h. Purification by column chromatography on silica gel (*n*-hexane/ethyl acetate, 9:1) gave **75** (125 mg, 96%) as yellow oil. IR (NaCl): 3113, 1642, 1584, 1524, 1349, 1257, 1213, 1163, 964, 788, 699  $\text{cm}^{-1}$ ;  $^1\text{H}$ -NMR (360 MHz,  $\text{CDCl}_3$ ):  $\delta$  7.98 (d,  $J = 13.7$  Hz, 1H), 7.58 (d,  $J = 13.7$  Hz, 1H), 7.54–7.46 (m, 2H), 7.42–7.32 (m, 2H);  $^{13}\text{C}$ -NMR (91 MHz,  $\text{CDCl}_3$ ):  $\delta$  150.0 (q,  $J = 1.8$  Hz), 138.6, 137.4, 132.3, 131.1, 127.5, 124.3, 121.2, 120.5 (q,  $J = 259$  Hz); HPLC (254 nm, system A):  $t_{\text{R}} = 20.5$  min; ESI-MS: 234.4  $[\text{M}+\text{H}]^+$ .

### 2-(3-(Trifluoromethoxy)phenyl)ethan-1-amine (**76**)<sup>26</sup>

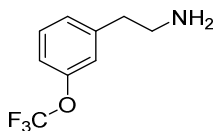

Compound **76** was synthesized according to the protocol of compound **56** using  $\text{LiAlH}_4$  (1 M in THF, 2.50 mL, 2.50 mmol) in dry THF (10 mL) and a solution of compound **75** (105 mg, 451  $\mu\text{mol}$ ) in dry THF (2 mL). The reaction time was 4 h. Purification by column chromatography on silica gel ( $\text{CH}_2\text{Cl}_2/\text{MeOH}/\text{NH}_3$  aqu. 25%, 30:1:0.03) afforded **76** (38.8 mg, 42%) as pale, yellow oil. IR (NaCl): 3358, 2934, 1589, 1489, 1262, 1217,

1163, 795, 701  $\text{cm}^{-1}$ ;  $^1\text{H}$ -NMR (360 MHz,  $\text{CDCl}_3$ ):  $\delta$  7.35–7.29 (m, 1H), 7.14 (d,  $J$  = 7.6 Hz, 1H), 7.11–7.04 (m, 2H), 3.05–2.96 (m, 2H), 2.85–2.76 (m, 2H), 2.00 (s, 2H);  $^{13}\text{C}$ -NMR (151 MHz,  $\text{CDCl}_3$ ):  $\delta$  149.6 (q,  $J$  = 1.5 Hz), 142.0, 129.9, 127.4, 121.4, 120.6 (q,  $J$  = 266 Hz), 118.9, 43.2, 39.3; HPLC (254 nm, system A):  $t_R$  = 15.5 min; ESI-MS: 206.3  $[\text{M}+\text{H}]^+$ .

***N,N,N*-Trimethyl-2-(3-(trifluoromethoxy)phenyl)ethan-1-aminium formate (27)**

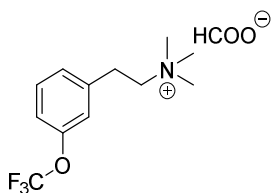

Compound **27** was synthesized according to the protocol of compound **1** using a solution of compound **76** (22.0 mg, 107  $\mu\text{mol}$ ) in dry DMF (2 mL), methyl iodide (80.0  $\mu\text{L}$ , 1.29 mmol) and  $\text{K}_2\text{CO}_3$  (47.1 mg, 343  $\mu\text{mol}$ ). Purification by preparative HPLC (system 3) afforded **27** (23.6 mg, 73%) as white solid. IR (NaCl): 3392, 3012, 2829, 1615, 1489, 1356, 1249, 1217, 1167, 773  $\text{cm}^{-1}$ ;  $^1\text{H}$ -NMR (600 MHz,  $\text{D}_2\text{O}$ ):  $\delta$  8.47 (s, 1H), 7.50–7.45 (m, 1H), 7.33 (d,  $J$  = 7.7 Hz, 1H), 7.31–7.26 (m, 2H), 3.63–3.56 (m, 2H), 3.24–3.16 (m, 11H);  $^{13}\text{C}$ -NMR (91 MHz,  $\text{D}_2\text{O}$ ):  $\delta$  171.5, 149.8 (q,  $J$  = 1.8 Hz), 138.6, 131.2, 128.3, 122.1, 120.9 (q, 258 Hz), 120.6, 67.3 (t,  $J$  = 2.7 Hz), 53.7 (t,  $J$  = 3.6 Hz), 29.2; HPLC (254 nm, system A):  $t_R$  = 14.3 min, purity: 98%, (254 nm, system B):  $t_R$  = 13.3 min, purity: 97%; HR-ESIMS: calcd 248.12568, found 248.12638  $[\text{M}]^+$ .

**2-(2,3-Dihydrobenzofuran-6-yl)-*N,N*-dimethylacetamide (77)** 30

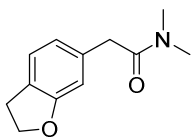

Compound **77** was synthesized according to the protocol of compound **64** using a solution of 2-(2,3-dihydrobenzofuran-6-yl) acetic acid (50.0 mg, 281  $\mu\text{mol}$ ) and [O-(7-azabenzotriazol-1-yl)-*N,N,N',N'*-tetramethyluronium-hexafluorophosphate] (120 mg,

316  $\mu\text{mol}$ ) in dry DMF (3 mL), diisopropylamine (90.0  $\mu\text{L}$ , 526  $\mu\text{mol}$ ) and dimethylamine (2 M in THF, 1.50 mL, 3.00 mmol). Purification by column chromatography on silica gel ( $\text{CH}_2\text{Cl}_2/\text{MeOH}$ , 60:1) afforded **77** (40.5 mg, 70%) as colorless oil. IR (NaCl): 2925, 2855, 1643, 1497, 1434, 1395, 1244, 1134, 990, 791  $\text{cm}^{-1}$ ;  $^1\text{H}$ -NMR (360 MHz,  $\text{CDCl}_3$ ):  $\delta$  7.12 (d,  $J = 7.5$  Hz, 1H), 6.73 (d,  $J = 7.6$  Hz, 1H), 6.69 (s, 1H), 4.55 (t,  $J = 8.7$  Hz, 2H), 3.66 (s, 2H), 3.17 (t,  $J = 8.7$  Hz, 2H), 2.98 (s, 3H), 2.95 (s, 3H);  $^{13}\text{C}$ -NMR (151 MHz,  $\text{CDCl}_3$ ):  $\delta$  171.2, 160.7, 135.3, 125.6, 125.0, 120.9, 109.9, 71.5, 41.2, 37.9, 35.8, 29.6; HPLC (254 nm, system A):  $t_{\text{R}} = 13.0$  min; ESI-MS: 228.4  $[\text{M}+\text{Na}]^+$ .

### 2-(2,3-Dihydrobenzofuran-6-yl)-*N,N*-dimethylethan-1-amine (**78**)

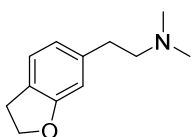

Compound **78** was synthesized according to the protocol of compound **41** using  $\text{LiAlH}_4$  (1 M in THF, 280  $\mu\text{L}$ , 280  $\mu\text{mol}$ ) in dry THF (4 mL) and a solution of compound **77** (8.0 mg, 39.0  $\mu\text{mol}$ ) in dry THF (1 mL). The reaction time was 1 h. Purification by column chromatography on silica gel ( $\text{CH}_2\text{Cl}_2/\text{MeOH}/\text{NH}_3$  aqu. 25%, 30:1:0.03) afforded **78** (4.0 mg, 54%) as pale yellow oil. IR (NaCl): 3408, 2943, 2858, 2779, 1624, 1591, 1498, 1433, 1427, 1101, 986, 808, 764  $\text{cm}^{-1}$ ;  $^1\text{H}$ -NMR (600 MHz,  $\text{CDCl}_3$ ):  $\delta$  7.10 (d,  $J = 7.5$  Hz, 1H), 6.69 (dd,  $J = 7.5, 1.3$  Hz, 1H), 6.64 (s, 1H), 4.55 (t,  $J = 8.7$  Hz, 2H), 3.16 (t,  $J = 8.6$  Hz, 2H), 2.81–2.75 (m, 2H), 2.66–2.58 (m, 2H), 2.38 (s, 6H);  $^{13}\text{C}$ -NMR (91 MHz,  $\text{CDCl}_3$ ):  $\delta$  160.5, 140.2, 124.9, 124.8, 120.8, 109.7, 71.4, 61.5, 45.3, 34.0, 29.6; HPLC (254 nm, system A):  $t_{\text{R}} = 11.5$  min; ESI-MS: 192.0  $[\text{M}+\text{H}]^+$ .

### 2-(2,3-Dihydrobenzofuran-6-yl)-*N,N,N*-trimethylethan-1-aminium formate (**28**)

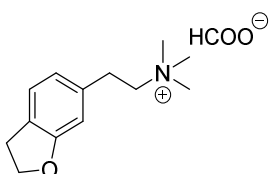

Compound **28** was synthesized according to the protocol of compound **1** using a solution of compound **78** (4.0 mg, 20.9  $\mu\text{mol}$ ) in dry DMF (2 mL) and methyl iodide (10.0  $\mu\text{L}$ , 161  $\mu\text{mol}$ ). Purification by preparative HPLC (system 2) afforded **28** (3.0 mg, 57%) as white solid. IR (NaCl): 3020, 2982, 2772, 1663, 1460, 1435, 1246, 1017, 985  $\text{cm}^{-1}$ ;  $^1\text{H}$ -NMR (600 MHz,  $\text{D}_2\text{O}$ ):  $\delta$  8.47 (s, 1H), 7.28 (d,  $J = 7.5$  Hz, 1H), 6.86 (d,  $J = 7.5$  Hz, 1H), 6.79 (s, 1H), 4.60 (t,  $J = 8.7$  Hz, 2H), 3.60–3.51 (m, 2H), 3.24–3.19 (m, 2H), 3.17 (s, 9H), 3.13–3.08 (m, 2H);  $^{13}\text{C}$ -NMR (151 MHz,  $\text{D}_2\text{O}$ ):  $\delta$  171.6, 160.0, 146.0, 127.5, 126.3, 122.2, 110.2, 72.6, 67.7, 53.7 (t,  $J = 4.5$  Hz), 29.4, 29.3; HPLC (220 nm, system A):  $t_{\text{R}} = 11.3$  min, purity: 95%, (220 nm, system B):  $t_{\text{R}} = 11.7$  min, purity: > 99%; HR-ESIMS: calcd 206.15394, found 206.15406  $[\text{M}]^+$ .

### 1,1-Dimethyl-3-(thiazol-2-ylmethoxy)pyrrolidin-1-ium 29a

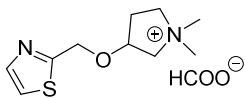

Compound **29a** was synthesized according to the protocol of compound **1** using a solution of 2-((pyrrolidin-3-yloxy)methyl)thiazole (7.00 mg, 38  $\mu\text{mol}$ ) in dry DMF (1 mL), methyl iodide (21  $\mu\text{L}$ , 340  $\mu\text{mol}$ ) and  $\text{K}_2\text{CO}_3$  (15.0 mg, 114  $\mu\text{mol}$ ). Purification by preparative HPLC (system 7) afforded **29a** (7.70 mg, 78%) as colorless oil.  $^1\text{H}$ -NMR (400 MHz,  $\text{D}_2\text{O}$ ):  $\delta$  7.84 (br s, 1H), 7.65 (br d,  $J = 2.2$  Hz, 1H), 4.96–4.85 (m, 2H), 4.68 (br s,  $J = 1.4$  Hz, 1H), 3.88–3.78 (m, 2H), 3.74 (dd,  $J = 13.5, 5.7$  Hz, 1H), 3.63 (ddd,  $J = 12.1, 8.5, 7.2$  Hz, 1H), 3.30 (s, 3H), 3.22 (s, 3H), 2.75–2.58 (m, 1H), 2.52–2.33 (m, 1H);  $^{13}\text{C}$ -NMR (1501 MHz,  $\text{D}_2\text{O}$ )  $\delta$  171.5, 142.7, 121.9, 78.4, 71.1 (t,  $J = 3.7$  Hz), 67.6, 65.7 (t,  $J = 3.3$  Hz), 54.1 (q,  $J = 4.4$  Hz), 30.7; HPLC (254 nm, system C):  $t_{\text{R}} = 4.5$  min, purity: 99%, (254 nm, system D):  $t_{\text{R}} = 3.8$  min, purity: 99%; HR-ESIMS: calcd 213.1056, found 213.1052  $[\text{M}]^+$ .

### 3-(((1-Methylpyrrolidin-3-yl)methoxy)methyl)pyridine 30a

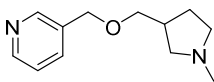

To obtain the free base of the 3-((pyrrolidin-3-ylmethoxy)methyl)pyridine hydrochloric acid, the compound was dissolved in water and basified to pH 10, three times with  $\text{CH}_2\text{Cl}_2$  and the solvent was removed under reduced pressure. To a solution of 3-((pyrrolidin-3-ylmethoxy)methyl)pyridine (80 mg, 0.42 mmol) in dry 1,2-dichloroethane/methanol (11 mL, 10:1) was added formaldehyde (aqu. solution stabilized with MeOH, 37 wt%, 156  $\mu\text{L}$ , 2.10 mmol), and sodium triacetoxyborohydride (356 mg, 1.68 mmol). The reaction mixture was stirred for 2 h at room temperature and subsequently, saturated, aqueous  $\text{NaHCO}_3$  solution was added and the aqueous phase was extracted three times with  $\text{CH}_2\text{Cl}_2$ . The combined organic layers were washed with saturated, aqueous NaCl solution and dried ( $\text{Na}_2\text{SO}_4$ ). After evaporation, the crude residue was purified by column chromatography on silica gel ( $\text{CH}_2\text{Cl}_2/\text{MeOH}/\text{NH}_3$  aqu. 25%, 7:1:0.01) to give **30a** (46.0 mg, 53%) as light brown oil.  $^1\text{H}$ -NMR (400 MHz,  $\text{D}_2\text{O}$ )  $\delta$  8.52 (d,  $J$  = 1.7 Hz, 1H), 8.50 (dd,  $J$  = 5.0, 1.6 Hz, 1H), 7.88 (dt,  $J$  = 7.9, 1.9 Hz, 1H), 7.48 (ddd,  $J$  = 7.9, 5.0, 0.7 Hz, 1H), 4.61 (s, 2H), 3.60 – 3.41 (m, 2H), 2.85 – 2.67 (m, 1H), 2.64 – 2.45 (m, 3H), 2.34 (dd,  $J$  = 10.0, 6.3 Hz, 1H), 2.31 (s, 3H), 2.05 – 1.87 (m, 1H), 1.47 (td,  $J$  = 13.3, 7.0 Hz, 1H);  $^{13}\text{C}$  NMR (100 MHz,  $\text{D}_2\text{O}$ )  $\delta$  148.7, 148.6, 137.8, 133.8, 124.6, 74.1, 70.3, 58.5, 55.1, 40.9, 37.2, 27.6; HPLC (254 nm, system C):  $t_{\text{R}}$  = 3.1 min, purity: 95%, (254 nm, system D):  $t_{\text{R}}$  = 2.6 min, purity: 95%; HR-ESIMS: calcd 207.1492, found 207.1493  $[\text{M}+\text{H}]^+$ .

### 3-(((1-Methylpiperidin-3-yl)oxy)methyl)pyridine **33a**

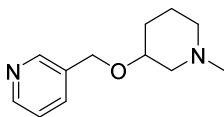

Compound **33a** was prepared according to the protocol of compound **30a** using a solution of 3-((piperidin-3-yloxy)methyl)pyridine (43.0 mg, 0.22 mmol) in dry 1,2-dichloroethane/methanol (5 mL, 10:1), formaldehyde (aqu. solution stabilized with MeOH, 37 wt%, 65.0  $\mu\text{L}$ , 110  $\mu\text{mol}$ ), and sodium triacetoxyborohydride (187 mg, 880  $\mu\text{mol}$ ). Purification by column chromatography on silica gel ( $\text{CH}_2\text{Cl}_2/\text{MeOH}/\text{NH}_3$  aqu. 25%, 10:1:0.1) afforded **33a** (8.80 mg, 19%) as a colorless oil.  $^1\text{H}$ -NMR (400 MHz,  $\text{D}_2\text{O}$ )  $\delta$ : 8.89–8.30 (m, 2H), 7.92 (d,  $J$  = 7.9 Hz, 1H), 7.49 (dd,  $J$  = 7.5, 5.0 Hz, 1H), 4.70

(s, 2H), 3.99 (br s, 1H), 3.57–3.18 (m, 2H), 3.16–2.96 (m, 1H), 2.82 (s, 3H), 2.12–1.95 (m, 2H), 1.86–1.53 (m, 2H);  $^{13}\text{C}$ -NMR (100 MHz,  $\text{D}_2\text{O}$ )  $\delta$  148.9, 148.8, 137.9, 134.2, 124.8, 70.5, 68.3, 57.1, 55.0, 44.1, 30.5, 30.3; HPLC (254 nm, system C):  $t_{\text{R}}$  = 2.9 min, purity: 95%, (254 nm, system D):  $t_{\text{R}}$  = 2.5 min, purity: 95%; HR-ESIMS: calcd 207.1492, found 207.1491  $[\text{M}+\text{H}]^+$ .

#### Biological experiments:

**IP-One<sup>®</sup> screening assay on M<sub>2</sub>R activation:** Receptor activation properties for all compounds at M<sub>2</sub>R were performed applying the IP accumulation assay IP-One<sup>®</sup> (Cisbio, Codolet, France) according to the manufacturer's protocol. In brief, HEK-293T cells were grown to a confluence of approx. 70% and transiently cotransfected with the human M<sub>2</sub>R and the hybrid G-protein G $\alpha_{\text{qi5-HA}}$  (G $\alpha_{\text{q}}$  protein with the last five amino acids at the C-terminus replaced by the corresponding sequence of G $\alpha_{\text{i}}$ ; grateful gift from The J. David Gladstone Institutes, San Francisco, CA), using the transfection method with the TransIT-293 Mirus transfection reagent (MoBiTec, Goettingen, Germany). After one day cells were detached from the culture dish with Versene (Life Technologies GmbH, Darmstadt, Germany), seeded into black 384-well plates (10000 cells/well) and maintained for 24 h at 37 °C. After incubation with the test compounds dissolved in stimulation buffer (ten different concentrations for each compound, total range from 0.01 pM up to 300  $\mu\text{M}$ ) for 2 h at 37 °C the detection reagents were added (IP1-d2 conjugate and Anti-IP1cryptate TB conjugate each dissolved in lysis buffer) and incubation was continued for 1 h at room temperature. Time resolved fluorescence resonance energy transfer (HTRF) was determined using the Clariostar plate reader (BMG, Ortenberg, Germany). Dose-response measurements were performed as duplicates. Resulting activation curves were normalized to the maximum effect of carbachol (100%) and buffer (0%) and analyzed using the algorithms for nonlinear regression in PRISM 6.0 (GraphPad, San Diego, CA). For all compounds 3-8 individual dose-response curves were measured, the corresponding EC<sub>50</sub> and E<sub>max</sub> values of each mean curve were calculated and summarized to get the average EC<sub>50</sub> and E<sub>max</sub> values  $\pm$  SEM.



## References

1. Cai, G.; Fu, Y.; Li, Y.; Wan, X.; Shi, Z., Indirect Ortho Functionalization of Substituted Toluenes through Ortho Olefination of N,N-Dimethylbenzylamines Tuned by the Acidity of Reaction Conditions. *J. Am. Chem. Soc.* **2007**, *129*, 7666-7673.
2. Barlow, R. B.; Oliverio, A.; Satta, M.; Thompson, G. M., Central Effects in Mice of Compounds Related to Nicotine. *Brit. J. Pharmacol.* **1970**, *39*, 647-652.
3. Buck, J. S.; Baltzly, R.; Ide, W. S., B-Phenylethylamine Derivatives. Tertiary and Quaternary Salts. *J. Am. Chem. Soc.* **1938**, *60*, 1789-1792.
4. Guo, L.; Liu, Y.; Yao, W.; Leng, X.; Huang, Z., Iridium-Catalyzed Selective A-Alkylation of Unactivated Amides with Primary Alcohols. *Org. Lett.* **2013**, *15*, 1144-1147.
5. Glennon, R. A.; Salley, J. J., Jr.; Steinsland, O. S.; Nelson, S., Synthesis and Evaluation of Novel Alkylpiperazines as Potential Dopamine Antagonists. *J. Med. Chem.* **1981**, *24*, 678-683.
6. Yan, H.; Yang, H.; Lu, L.; Liu, D.; Rong, G.; Mao, J., Copper-Catalyzed Synthesis of A,B-Unsaturated Acylamides Via Direct Amidation from Cinnamic Acids and N-Substituted Formamides. *Tetrahedron* **2013**, *69*, 7258-7263.
7. Bai, D.; Huang, S.-H.; Lin, Z.; Yang, L.; Dai, J.; Huang, M.-Y.; Jia, X.; Hong, R., Aza-Bellus-Claisen Rearrangement-Enabled Synthesis of Racemic Tapentadol and Its Stereoisomers. *Chin. J. Chem.* **2013**, *31*, 317-320.
8. Soler, R.; Cacchi, S.; Fabrizi, G.; Forte, G.; Martin, L.; Martinez, S.; Molins, E.; Moreno-Manas, M.; Petrucci, F.; Roig, A.; Sebastian, R. M.; Vallribera, A., Sonogashira Cross-Coupling Using Carbon Aerogel Doped with Palladium Nanoparticles; a Recoverable and Reusable Catalyst. *Synthesis* **2007**, 3068-3072.
9. Wang, T.; Zhou, W.; Yin, H.; Ma, J.-A.; Jiao, N., Iron-Facilitated Oxidative Dehydrogenative C-O Bond Formation by Propargylic Csp<sup>3</sup>-H Functionalization. *Angew. Chem., Int. Ed.* **2012**, *51*, 10823-10826.

10. Conn, C.; Shimmmon, R.; Cordaro, F.; Hargraves, T. L.; Ibrahim, P., Combinatorial Synthesis of Ssao Inhibitors Using Sonogashira Coupling: Sar of Aryl Propargylic Amines. *Bioorg. Med. Chem. Lett.* **2001**, *11*, 2565-2568.
11. Narasimhan, N. S.; Bhide, B. H., Novel Syntheses of Methoxyisoquinolines and -Isocoumarins. *Tetrahedron Lett.* **1968**, 4159-4162.
12. Perrone, R.; Berardi, F.; Colabufo, N. A.; Leopoldo, M.; Tortorella, V., A Structure-Affinity Relationship Study on Derivatives of N-[2-[4-(4-Chlorophenyl)Piperazin-1-Yl]Ethyl]-3-Methoxybenzamide, a High-Affinity and Selective D4 Receptor Ligand. *J. Med. Chem.* **2000**, *43*, 270-277.
13. Sall, D. J.; Grunewald, G. L., Inhibition of Phenylethanolamine N-Methyltransferase (Pnmt) by Aromatic Hydroxy-Substituted 1,2,3,4-Tetrahydroisoquinolines. Further Studies on the Hydrophilic Pocket of the Aromatic Ring Binding Region of the Active Site. *J. Med. Chem.* **1987**, *30*, 2208-2216.
14. Bock, M. G.; Gaul, C.; Gummadi, V. R.; Moebitz, H.; Sengupta, S. Preparation of Aryl and Heteroaryl Fused Piperidinone Compounds as Therapeutic 17 $\alpha$ -Hydroxylase/C17,20-Lyase Inhibitors. WO2012035078A1, 2012.
15. Xie, Y.; Hu, J.; Hong, X.; Wei, Y.; Jia, J., A Novel Synthesis of Isoquinolone Derivatives. *Youji Huaxue* **2010**, *30*, 894-897.
16. Hibert, M.; Zimmermann, A. Preparation of 2-Amino-8-Methoxy-1,2,3,4-Tetrahydronaphthalenes for the Treatment of Migraine. EP450238A1, 1991.
17. Romero-Alonso, L.; Zamanillo-Castanedo, D.; Vela-Hernandez, J.-M.; Buschmann, H. H. Preparation of Heterocyclicarylalkylamines, Heterocyclitetrahydronaphthalenylamine, and Analogs Thereof for Use as 5-Ht7 Receptor Ligands. WO2008145335A1, 2008.
18. Arvidsson, L. E.; Hacksell, U.; Johansson, A.; Nilsson, J. L. G.; Lindberg, P.; Sanchez, D.; Wikstroem, H.; Svensson, K.; Hjorth, S.; Carlsson, A., 8-Hydroxy-2-(Alkylamino)Tetralins and Related Compounds as Central 5-Hydroxytryptamine Receptor Agonists. *J. Med. Chem.* **1984**, *27*, 45-51.
19. Junge, B.; Schohe, R.; Seidel, P. R.; Glaser, T.; Traber, J.; Benz, U.; Schuurman, T.; De Vry, J. M. V. Aminomethyltetralins, -Chromanes, and Related Compounds as Cns Agents. DE3901814A1, 1990.

20. Cecchi, R.; Guzzi, U. Phenylethanolaminomethyltetralins, Their Preparation, and Pharmaceuticals Containing Them for Treatment of Intestinal Disorders and Glaucoma. EP436435A1, 1991.
21. Dugar, S.; Mahajan, D.; Deokar, R. C.; Hollinger, F. P.; Kapoor, K. K. Preparation of Heteroarylmorpholinotriazine Derivatives and Analogs for Use as Antiproliferative Agents. WO2012101654A2, 2012.
22. Stjernlof, P.; Lin, C.-H.; Sonesson, C.; Svensson, K.; Smith, M. W., (Dipropylamino)Tetrahydronaphthofurans: Centrally Acting Serotonin Agonists and Dopamine Agonists-Antagonists. *Bioorg. Med. Chem. Lett.* **1997**, *7*, 2759-2764.
23. Boehme, T. M.; Augelli-Szafran, C. E.; Hallak, H.; Pugsley, T.; Serpa, K.; Schwarz, R. D., Synthesis and Pharmacology of Benzoxazines as Highly Selective Antagonists at M4 Muscarinic Receptors. *J. Med. Chem.* **2002**, *45*, 3094-3102.
24. Schrittwieser, J. H.; Resch, V.; Wallner, S.; Lienhart, W.-D.; Sattler, J. H.; Resch, J.; Macheroux, P.; Kroutil, W., Biocatalytic Organic Synthesis of Optically Pure (S)-Scoulerine and Berbine and Benzyloquinoline Alkaloids. *J. Org. Chem.* **2011**, *76*, 6703-6714.
25. Allen, J. G.; Briner, K.; Cohen, M. P.; Galka, C. S.; Hellman, S. L.; Martinez-Grau, M. A.; Reinhard, M. R.; Rodriguez, M. J.; Rothhaar, R. R.; Tidwell, M. W.; Victor, F.; Williams, A. C.; Zhang, D.; Boyd, S. A.; Conway, R. G.; Deo, A. S.; Lee, W.-M.; Siedem, C. S.; Singh, A. Preparation of 6-Substituted 2,3,4,5-Tetrahydro-1h-Benzo[D]Azepines as 5-Ht2c Receptor Agonists. WO2005082859A1, 2005.
26. Chen, Z.; Cohen, M. P.; Fisher, M. J.; Giethlen, B.; Gillig, J. R.; McCowan, J. R.; Miller, S. C.; Schaus, J. M. Preparation of N-(2-Arylethyl)Benzylamines as Antagonists of the 5-Ht6 Receptor. WO2002078693A2, 2002.
27. Chen, J.; Liu, D.; Butt, N.; Li, C.; Fan, D.; Liu, Y.; Zhang, W., Palladium-Catalyzed Asymmetric Hydrogenation of A-Acyloxy-1-Arylethanones. *Angew. Chem., Int. Ed.* **2013**, *52*, 11632-11636.
28. Labrie, F.; Singh, S.; Gauthier, S.; Frechette, Y.; Chenard, S.; Breton, R. Preparation of Helix 12 Directed Steroids for the Treatment of Androgen Related Diseases. WO2005066194A1, 2005.

29. Barlow, R. B.; Thompson, G. M.; Scott, N. C., Affinity and Activity of Compounds Related to Nicotine on the Rectus Abdominis Muscle of the Frog (*Rana Pipiens*). *Brit. J. Pharmacol.* **1969**, *37*, 555-584.
30. Xu, G. Q.; Liang, H.; Fang, J.; Jia, Z. L.; Chen, J. Q.; Xu, P. F., Catalytic Enantioselective Alpha-Fluorination of 2-Acyl Imidazoles Via Iridium Complexes. *Chem. Asian J.* **2016**, *11*, 3355-3358.
